# Supplementary material for: Genetic diversity and population structure analysis in a large collection of white clover (Trifolium repens L.) germplasm worldwide
Source: PeerJ. 2021 May 3;9:e11325. doi: 10.7717/peerj.11325 (PMC8101478; doi:10.7717/peerj.11325)
Supplement: Table S3 [file peerj-09-11325-s003.xlsx]

## Sheet: Sheet1
	Tr_001	Tr_002	Tr_003	Tr_004	Tr_005	Tr_006	Tr_007	Tr_008	Tr_009	Tr_010	Tr_011	Tr_012	Tr_013	Tr_014	Tr_015	Tr_016	Tr_017	Tr_018	Tr_019	Tr_020	Tr_021	Tr_022	Tr_023	Tr_024	Tr_025	Tr_026	Tr_027	Tr_028	Tr_029	Tr_030	Tr_031	Tr_032	Tr_033	Tr_034	Tr_035	Tr_036	Tr_037	Tr_038	Tr_039	Tr_040	Tr_041	Tr_042	Tr_043	Tr_044	Tr_045	Tr_046	Tr_047	Tr_048	Tr_049
Tr_001	0
Tr_002	89	0
Tr_003	112	115	0
Tr_004	123	118	129	0
Tr_005	105	110	103	116	0
Tr_006	111	112	145	116	128	0
Tr_007	97	106	101	102	102	118	0
Tr_008	104	105	118	113	93	125	101	0
Tr_009	114	105	128	109	115	123	105	110	0
Tr_010	111	108	121	104	102	120	96	87	109	0
Tr_011	113	114	111	104	106	112	94	109	103	108	0
Tr_012	126	117	118	117	121	127	109	130	106	115	123	0
Tr_013	102	117	122	127	109	115	103	122	98	117	119	110	0
Tr_014	128	135	134	123	123	121	119	124	126	127	105	112	128	0
Tr_015	111	116	129	114	102	120	116	103	125	108	120	125	117	115	0
Tr_016	117	98	119	114	96	106	106	95	107	106	104	117	123	109	96	0
Tr_017	111	108	117	114	112	110	114	113	131	116	106	119	121	113	120	106	0
Tr_018	115	122	121	130	102	122	128	117	117	120	106	129	119	115	106	102	98	0
Tr_019	119	114	129	128	128	122	114	131	105	130	108	117	103	123	126	114	130	118	0
Tr_020	119	116	127	108	110	128	122	115	121	106	108	113	117	109	106	104	108	110	112	0
Tr_021	119	110	125	102	114	134	116	109	117	118	120	109	117	125	122	104	106	122	118	112	0
Tr_022	112	105	112	111	89	133	103	104	122	117	109	104	122	128	111	107	115	115	121	103	105	0
Tr_023	122	103	114	117	105	105	105	118	104	125	99	118	122	126	111	99	123	115	113	105	119	102	0
Tr_024	134	133	128	127	123	131	119	128	124	137	113	114	126	124	123	107	119	95	133	121	123	116	122	0
Tr_025	98	105	128	129	119	127	101	106	124	109	117	116	116	128	117	113	111	127	117	111	129	108	116	110	0
Tr_026	110	115	110	129	111	125	115	112	116	117	119	112	108	126	125	105	123	109	115	111	103	116	124	130	118	0
Tr_027	116	115	114	123	99	131	105	116	124	111	121	110	124	118	107	91	109	95	129	109	123	104	106	110	108	110	0
Tr_028	106	113	102	117	93	143	97	98	112	113	121	124	114	122	117	113	105	109	123	113	93	94	106	136	108	108	110	0
Tr_029	106	119	112	127	97	127	107	106	124	119	99	132	124	118	111	99	107	109	121	91	107	106	110	120	112	102	110	96	0
Tr_030	149	138	125	124	118	138	134	125	119	130	126	113	129	131	126	112	124	128	112	120	110	109	127	139	127	115	125	109	119	0
Tr_031	117	120	125	122	102	134	114	113	113	120	120	113	131	125	104	106	116	114	112	106	122	99	115	125	99	111	97	101	115	108	0
Tr_032	125	118	115	138	110	126	122	133	127	120	122	135	121	131	118	106	114	110	116	120	130	121	105	109	131	117	101	115	113	130	114	0
Tr_033	106	101	100	115	99	123	109	102	120	103	113	110	114	118	107	103	97	117	115	103	119	100	118	110	100	110	114	96	114	109	111	121	0
Tr_034	115	112	121	130	100	118	110	125	113	110	124	113	109	113	110	96	116	98	120	110	132	109	121	109	111	109	99	105	129	134	100	90	111	0
Tr_035	128	107	130	127	119	107	119	130	128	129	121	116	118	126	99	97	115	121	131	117	131	118	114	122	122	116	126	122	118	123	117	123	112	107	0
Tr_036	134	129	142	127	115	125	141	124	124	129	125	122	120	132	125	109	129	121	105	99	121	122	120	120	128	124	118	128	124	127	123	117	114	115	120	0
Tr_037	132	113	118	113	117	127	115	116	122	113	109	122	130	126	115	121	109	125	127	107	113	106	114	126	126	110	114	114	108	131	123	117	106	121	112	118	0
Tr_038	125	112	127	124	114	116	120	119	115	120	118	113	119	125	110	98	120	118	108	112	112	111	111	115	127	125	115	121	109	118	104	108	117	114	113	119	117	0
Tr_039	106	125	122	129	111	121	109	98	112	115	109	120	104	122	105	103	119	115	115	113	115	102	118	126	126	104	112	110	94	121	127	121	110	127	132	118	102	101	0
Tr_040	119	126	129	120	116	118	114	115	109	120	114	117	103	121	130	110	114	116	106	112	100	117	101	133	123	105	121	103	115	112	122	136	115	118	127	111	115	112	99	0
Tr_041	123	118	117	120	118	130	108	119	113	118	116	105	109	115	112	108	112	118	120	118	106	109	121	117	111	107	109	105	119	122	130	124	93	112	121	121	103	124	101	88	0
Tr_042	109	108	107	120	90	124	102	105	103	114	96	131	111	115	110	96	112	100	106	114	106	109	103	127	113	97	101	101	93	122	98	104	113	110	121	117	97	120	93	96	102	0
Tr_043	118	107	130	109	99	117	105	100	112	109	103	116	112	116	103	95	103	103	119	81	117	108	104	110	110	116	106	102	96	125	105	107	114	103	102	106	118	95	118	113	115	109	0
Tr_044	118	115	112	113	105	125	109	108	106	111	101	124	116	112	101	91	109	95	123	105	119	102	124	110	118	112	110	118	112	129	115	125	110	121	118	118	126	115	102	113	109	95	102	0
Tr_045	132	117	124	127	101	123	107	114	112	123	119	114	108	118	111	99	123	105	129	121	115	116	114	112	122	112	106	112	126	119	125	123	122	105	128	118	130	105	116	105	109	115	106	102	0
Tr_046	126	121	120	131	117	133	113	118	112	125	127	110	118	118	133	119	107	115	121	115	121	100	120	122	130	116	112	104	128	117	123	133	110	113	124	128	126	121	110	103	99	117	118	102	98	0
Tr_047	95	108	105	112	80	116	104	89	101	104	106	115	103	119	98	90	106	100	124	114	118	91	113	119	115	105	109	83	97	118	102	116	95	100	111	119	107	106	101	112	110	92	101	97	99	99	0
Tr_048	116	119	116	125	137	127	123	132	122	133	117	120	126	120	135	115	113	123	121	119	117	116	122	138	126	110	124	124	130	131	115	145	122	129	106	138	140	123	136	115	115	121	122	112	128	110	109	0
Tr_049	132	125	130	131	119	141	123	122	116	117	121	112	126	128	135	123	121	113	121	121	119	114	132	128	132	128	118	110	122	127	113	127	134	117	128	136	126	117	110	119	131	101	112	108	114	62	91	114	0
Tr_050	115	122	129	114	104	124	108	105	127	110	110	121	115	125	120	118	112	108	122	124	112	105	121	127	105	107	123	99	111	124	112	128	103	122	117	121	107	114	107	104	102	88	105	105	117	115	86	125	117
Tr_051	116	105	120	113	105	117	109	118	120	115	125	102	104	114	109	93	111	105	123	109	121	100	116	114	118	112	106	122	114	127	113	115	96	97	116	116	124	93	110	117	113	117	98	96	88	100	87	110	100
Tr_052	109	108	121	132	88	116	112	101	125	114	110	107	109	93	94	90	106	88	112	102	124	91	115	111	113	105	85	107	105	120	90	104	99	92	111	111	101	96	95	120	100	92	99	97	99	87	86	115	95
Tr_053	121	118	127	128	108	126	122	109	127	116	120	119	99	119	108	104	116	98	112	122	118	117	125	129	125	103	115	115	111	126	110	122	121	98	115	113	129	118	101	106	116	102	117	105	113	113	104	119	109
Tr_054	108	97	130	123	109	101	109	112	112	117	109	126	106	134	117	97	115	121	119	123	117	100	102	126	112	130	120	104	108	135	137	117	116	111	108	118	110	115	108	111	119	105	106	116	112	130	91	122	114
Tr_055	113	114	107	134	110	136	104	123	121	136	114	103	125	111	124	98	106	108	120	104	114	111	111	113	125	119	109	111	87	130	114	114	109	112	121	127	109	122	115	116	106	96	109	111	115	113	100	117	103
Tr_056	120	97	132	119	113	121	123	114	122	113	115	112	130	106	115	111	103	113	125	125	105	120	118	118	118	118	114	120	114	129	115	119	110	107	128	140	132	111	122	129	117	111	108	116	126	114	103	122	104
Tr_057	108	105	116	113	119	125	113	122	116	127	107	102	128	116	123	103	103	109	121	109	115	112	112	116	104	106	106	114	106	123	115	107	110	105	124	128	118	119	120	127	123	103	114	118	114	122	107	118	114
Tr_058	113	116	117	112	112	116	110	113	123	122	112	107	117	127	128	120	114	120	112	128	120	119	129	127	113	119	117	113	107	114	122	128	103	132	125	129	111	128	113	120	104	116	105	115	117	121	110	125	135
Tr_059	133	126	119	126	128	124	120	113	135	132	118	113	109	125	128	114	130	134	120	130	122	129	121	141	131	119	111	115	109	116	138	134	117	126	133	135	121	134	115	122	108	126	115	129	123	123	122	123	137
Tr_060	129	118	127	130	102	134	124	105	137	108	128	123	123	121	122	112	118	122	134	120	130	113	127	137	125	121	109	119	121	132	130	130	107	112	127	121	117	122	129	132	120	114	129	127	113	111	106	135	123
Tr_061	120	125	120	127	113	125	111	124	132	123	115	126	112	118	123	115	121	133	125	109	129	110	114	140	110	112	110	116	114	127	113	141	128	125	124	130	112	125	122	117	113	121	112	110	124	110	101	120	118
Tr_062	112	103	120	119	105	121	103	98	112	113	107	102	112	118	119	107	111	111	111	105	113	110	102	120	112	104	110	102	100	129	117	109	100	109	112	124	116	113	112	101	107	99	94	114	110	106	99	112	110
Tr_063	113	104	113	118	104	114	112	115	105	112	100	101	105	103	112	102	108	120	116	106	116	99	111	133	117	109	113	113	107	118	122	128	101	108	105	125	109	100	105	106	108	102	113	99	115	111	102	115	113
Tr_064	118	119	130	131	107	119	111	116	128	121	119	104	114	120	109	113	113	107	123	113	129	108	112	128	122	114	104	118	118	121	107	125	112	119	114	122	118	113	108	123	113	117	116	126	120	124	111	120	134
Tr_065	106	99	120	105	101	115	103	106	116	95	99	102	108	110	113	93	103	113	111	111	117	112	116	110	92	112	100	116	114	127	101	113	96	97	122	116	112	115	110	123	109	93	106	106	108	114	91	136	102
Tr_066	98	111	114	115	103	119	97	110	112	111	91	110	118	118	125	93	103	107	121	99	115	110	108	106	110	108	82	110	94	125	107	103	116	109	130	124	114	123	110	113	111	89	100	110	96	106	95	124	102
Tr_067	109	110	123	110	92	116	120	99	127	114	118	125	117	115	100	102	108	112	130	114	106	107	113	133	127	123	115	103	109	128	118	118	111	114	113	107	121	122	127	108	122	106	107	113	115	119	94	119	121
Tr_068	114	121	134	113	125	137	105	118	140	121	115	134	128	132	119	121	123	137	117	119	139	120	120	134	112	140	120	122	118	139	131	129	122	125	126	122	136	147	128	123	111	125	116	116	128	134	125	136	152
Tr_069	127	112	131	126	118	124	116	111	125	116	108	101	127	125	136	112	106	130	124	128	106	105	117	127	119	129	125	115	115	134	120	120	119	126	139	121	121	116	123	112	124	120	115	119	121	125	112	131	113
Tr_070	126	127	110	131	115	141	125	126	132	119	119	114	128	116	113	121	111	113	137	111	123	122	120	122	130	132	108	118	108	127	123	111	114	117	138	118	124	117	114	113	103	119	118	124	120	112	111	136	130
Tr_071	117	114	133	114	120	134	128	113	123	110	124	109	117	113	128	112	104	110	124	106	120	125	111	125	121	123	117	111	109	140	122	112	113	118	135	113	127	126	123	122	128	122	109	133	121	129	110	137	121
Tr_072	111	118	103	122	104	132	110	97	125	100	120	139	111	121	118	110	108	124	114	122	130	101	105	137	121	123	111	103	113	126	110	104	99	116	125	139	105	124	119	124	118	104	125	113	137	119	94	135	127
Tr_073	124	115	128	133	121	119	125	122	120	123	115	130	124	132	139	105	115	133	125	117	123	134	116	138	134	124	122	136	116	119	129	133	126	141	134	126	124	121	128	141	137	129	130	120	120	132	115	126	128
Tr_074	97	96	117	126	112	126	98	113	99	124	118	107	99	121	118	104	94	112	108	108	118	103	109	115	101	113	109	103	97	118	104	116	107	110	123	123	121	102	103	112	100	110	103	113	107	101	94	111	111
Tr_075	99	112	123	134	118	130	114	115	137	130	118	123	119	127	122	130	114	128	122	116	142	111	117	129	113	133	115	117	113	140	124	130	115	122	127	131	125	132	109	138	130	126	125	133	135	135	120	129	137
Tr_076	113	120	147	128	118	128	116	119	117	106	118	127	119	121	124	118	124	124	114	102	130	113	123	137	117	143	109	123	129	128	116	122	127	120	135	133	133	126	121	134	128	120	103	135	131	139	126	121	131
Tr_077	139	140	135	138	128	130	134	135	121	136	126	137	135	123	134	124	144	140	132	124	126	139	113	139	135	123	125	131	125	146	140	126	131	140	139	137	127	136	125	128	118	124	137	133	131	133	132	115	137
Tr_078	113	130	127	116	100	130	114	101	111	118	116	123	125	111	112	110	112	118	126	114	116	113	115	125	109	115	115	107	111	130	112	124	113	122	125	125	107	124	111	118	118	102	109	119	127	119	98	123	115
Tr_079	117	120	119	128	108	128	122	121	131	114	118	129	125	129	110	114	122	118	134	122	124	121	113	135	131	113	111	109	113	134	122	126	119	118	135	131	131	116	125	114	114	122	123	111	113	125	112	121	137
Tr_080	121	116	129	134	118	126	138	117	125	128	120	123	113	131	124	130	128	128	130	124	130	125	119	135	129	125	133	141	129	144	122	130	135	122	133	129	141	128	123	124	124	116	119	105	123	119	126	127	117
Tr_081	107	122	119	108	104	132	120	109	115	108	114	129	123	123	98	114	116	110	130	114	110	117	121	133	125	125	117	103	105	136	114	124	115	114	129	125	125	120	119	116	122	104	117	105	123	127	96	127	115
Tr_082	122	125	140	125	117	127	131	128	116	125	121	118	118	108	129	111	125	127	115	121	113	134	126	132	128	110	116	114	114	119	123	137	106	131	122	122	140	123	132	129	121	125	128	140	124	120	115	126	128
Tr_083	99	112	117	116	100	130	100	113	115	112	122	109	115	121	118	100	112	116	124	112	110	109	119	99	115	113	105	109	111	128	106	116	111	112	127	135	125	108	111	110	100	118	105	119	111	105	108	129	103
Tr_084	119	124	123	110	126	116	114	111	105	126	106	123	115	123	114	112	118	124	140	114	134	115	113	129	121	139	117	115	125	126	128	136	119	122	119	123	131	112	115	122	128	132	111	115	115	125	122	127	143
Tr_085	99	98	109	120	96	136	106	109	101	102	114	117	129	135	122	112	126	128	128	118	112	105	117	129	115	121	113	113	121	136	110	116	121	112	143	139	121	118	121	126	120	112	117	117	121	129	100	123	119
Tr_086	107	100	119	120	102	118	114	111	105	104	108	113	111	131	114	120	120	132	124	112	124	111	121	129	129	117	121	125	109	136	130	122	111	118	127	123	125	118	109	114	108	120	115	111	121	127	112	119	119
Tr_087	119	102	133	134	124	124	118	109	129	112	108	109	125	121	126	112	118	130	122	122	120	113	121	133	127	121	123	129	121	134	136	138	113	120	121	131	129	118	125	110	124	122	113	123	123	119	122	127	127
Tr_088	120	113	124	119	109	135	117	94	116	99	115	124	114	122	109	109	111	111	127	105	115	108	126	120	116	116	114	108	106	137	127	121	114	125	126	128	110	119	114	111	115	113	112	104	114	122	107	144	122
Tr_089	125	108	135	122	112	122	108	105	115	108	120	117	117	121	114	98	108	112	134	114	124	121	115	123	115	119	101	121	115	142	126	124	119	114	121	131	129	130	117	120	118	122	109	113	113	135	110	143	123
Tr_090	107	112	133	118	106	118	116	113	111	112	126	125	115	137	114	104	110	126	144	112	118	107	125	139	129	117	115	115	125	136	118	130	109	124	113	119	135	116	125	120	130	126	111	105	121	137	102	107	135
Tr_091	119	116	127	126	122	130	126	117	121	118	122	133	121	141	126	126	122	120	142	120	122	129	135	117	115	129	121	117	129	136	122	130	105	126	129	141	113	122	135	134	116	120	121	125	123	135	106	133	119
Tr_092	112	115	142	129	117	139	135	122	124	129	123	132	128	126	125	125	129	125	139	127	121	124	130	128	138	142	130	128	124	145	143	137	132	125	138	130	144	135	132	125	125	117	130	120	124	136	127	122	128
Tr_093	103	100	121	118	108	126	110	107	101	106	106	109	109	125	112	102	112	122	120	106	102	123	111	123	113	113	115	115	115	144	118	114	113	104	117	123	127	106	123	112	112	114	105	119	119	117	114	125	117
Tr_094	125	106	131	122	104	130	122	105	127	112	118	121	117	125	114	110	114	128	142	114	108	121	119	117	123	123	105	113	103	138	124	114	117	110	123	117	115	112	123	108	124	118	95	125	113	127	112	139	123
Tr_095	122	119	132	127	121	149	121	120	124	111	119	128	134	140	133	119	121	115	135	129	125	112	130	124	128	120	116	122	122	137	113	127	118	133	130	130	124	123	122	119	125	115	124	124	124	126	111	134	128
Tr_096	110	99	126	119	103	119	109	90	110	99	111	108	114	116	105	101	105	107	119	103	105	104	120	116	106	112	108	120	110	119	107	127	106	111	118	112	124	107	116	113	115	93	98	106	104	112	91	130	118
Tr_097	120	105	110	133	107	133	109	98	114	111	123	120	124	136	111	111	117	115	133	127	121	110	108	118	114	122	126	110	122	135	117	131	100	117	124	116	126	129	122	105	115	109	110	104	114	112	95	128	116
Tr_098	113	112	133	124	114	124	106	109	119	108	114	113	123	123	118	114	116	122	130	118	134	117	121	125	115	117	105	123	121	140	110	116	121	124	131	133	127	118	115	136	124	114	109	109	129	117	110	115	107
Tr_099	135	128	137	142	116	134	132	139	137	134	122	133	125	123	134	128	126	120	126	116	138	129	121	127	137	131	125	133	121	134	130	114	117	108	139	129	137	124	129	116	122	120	115	139	121	123	118	133	119
Tr_100	119	126	131	132	118	136	120	113	109	106	120	117	113	119	118	104	118	126	136	114	130	131	135	121	113	117	105	121	113	130	132	130	117	124	119	131	123	128	123	130	112	118	123	113	119	125	104	125	121
Tr_101	123	114	133	116	114	146	110	107	119	114	120	115	127	131	126	114	126	118	142	122	124	117	123	127	111	123	109	105	107	120	122	124	113	126	131	121	129	118	113	120	124	110	111	123	117	123	102	129	109
Tr_102	126	121	140	133	133	129	121	130	130	127	119	122	108	128	141	129	133	145	119	135	137	128	142	142	120	120	132	134	136	123	131	145	126	131	142	136	142	133	114	127	121	129	128	134	126	136	129	140	134
Tr_103	116	129	136	131	119	119	117	132	128	127	111	118	122	116	117	107	119	109	121	123	139	110	120	124	120	114	110	122	118	127	119	133	108	125	122	120	148	117	116	117	127	129	116	112	108	128	97	116	140
Tr_104	122	111	138	123	103	139	119	120	114	111	111	130	114	124	119	111	115	117	141	123	127	114	130	134	120	120	120	122	118	137	131	131	116	123	120	122	130	121	116	123	117	109	108	96	114	120	109	116	122
Tr_105	120	125	132	117	123	119	119	128	114	111	125	128	118	116	111	113	125	129	129	113	123	130	114	132	134	128	142	132	122	147	133	131	118	121	108	124	132	121	132	131	145	125	110	124	126	126	115	126	116
Tr_106	115	110	145	134	110	134	114	113	119	108	122	119	119	131	124	118	116	112	130	114	124	109	127	125	121	121	113	115	117	136	108	120	121	116	115	131	143	122	133	116	130	120	93	119	111	125	114	125	119
Tr_107	130	127	132	129	121	129	131	126	122	111	119	132	134	136	123	113	123	127	133	107	145	132	120	128	120	130	124	138	122	147	117	125	124	129	120	126	142	119	138	129	141	137	114	116	122	136	125	118	126
Tr_108	127	116	149	126	110	124	126	121	119	114	112	133	123	117	110	102	120	102	136	110	130	123	123	111	125	137	123	133	117	140	134	122	113	126	107	115	127	118	119	136	140	120	105	107	119	131	112	141	123
Tr_109	126	103	134	127	119	129	119	112	108	105	123	112	122	110	111	93	113	131	139	103	127	124	114	136	116	128	122	120	116	127	125	117	102	117	112	122	134	113	118	121	127	123	100	120	108	116	115	124	122
Tr_110	117	116	135	146	130	142	120	139	133	130	128	119	117	127	118	114	126	128	132	126	132	133	133	127	119	117	117	133	139	134	132	126	125	124	129	129	139	136	125	130	124	122	137	127	123	127	130	133	135
Tr_111	105	102	133	120	104	118	114	113	121	102	116	119	109	119	108	94	104	112	106	104	122	107	109	117	115	119	103	117	105	126	108	112	115	108	115	123	119	120	117	110	122	104	113	107	121	111	108	121	105
Tr_112	114	125	116	129	117	127	115	110	118	125	105	118	108	124	117	93	135	125	117	121	125	110	112	126	122	114	118	104	112	113	111	125	116	111	120	122	128	121	102	107	117	105	120	120	118	114	95	110	110
Tr_113	128	125	146	137	123	135	115	134	134	131	119	130	128	124	113	111	129	129	127	121	129	114	126	134	140	130	128	138	132	137	133	129	130	125	120	128	128	123	122	119	131	105	120	118	120	122	121	130	124
Tr_114	114	103	114	135	97	137	109	106	124	103	125	108	116	126	103	105	115	113	133	121	123	96	116	126	120	126	96	96	114	129	101	123	108	105	120	132	124	117	106	119	117	109	110	120	110	112	97	134	104
Tr_115	130	123	140	125	129	127	123	114	124	113	121	114	136	124	137	117	119	137	125	125	139	130	132	138	126	142	122	138	138	149	129	157	130	143	142	130	142	131	126	123	129	133	140	122	138	138	131	130	138
Tr_116	114	113	116	139	119	129	119	132	130	133	111	118	114	114	127	127	113	115	121	111	131	114	126	132	120	112	114	118	110	117	119	127	122	131	132	128	138	115	106	123	129	111	120	110	116	106	111	128	118
Tr_117	122	107	138	119	95	123	131	114	110	113	129	132	132	138	121	113	107	121	131	119	125	120	124	120	136	128	114	120	118	133	117	115	120	113	130	130	132	123	128	117	129	99	114	116	124	120	91	140	104
Tr_118	125	128	121	130	116	128	100	115	125	120	108	113	121	113	116	114	112	122	116	118	138	105	111	115	115	123	113	117	119	126	112	128	117	122	125	109	123	114	107	116	114	104	121	121	111	119	110	129	125
Tr_119	109	110	133	120	114	130	122	113	119	104	116	129	125	113	108	104	120	120	128	120	122	127	141	131	119	115	111	127	125	132	128	120	119	114	135	121	137	120	109	116	116	114	117	115	119	125	108	129	113
Tr_120	108	105	126	129	117	127	101	118	134	113	119	122	116	136	105	105	115	115	119	117	129	104	108	122	104	114	104	116	112	123	111	103	120	125	118	128	126	119	116	113	113	109	114	118	116	118	95	122	122
Tr_121	127	122	123	118	122	140	100	119	121	108	124	109	119	129	126	110	126	138	120	118	112	125	127	129	113	103	107	107	123	118	118	128	127	116	135	127	127	136	129	122	112	114	121	127	119	121	110	121	131
Tr_122	138	115	120	127	105	137	121	120	126	121	115	132	122	128	119	111	123	113	121	103	123	112	114	126	130	118	118	128	110	131	135	123	116	115	126	116	118	135	132	113	125	121	102	112	118	128	107	132	124
Tr_123	130	113	146	125	123	133	121	132	124	113	127	152	116	138	123	115	131	131	127	117	135	132	140	140	132	128	114	138	128	153	141	129	132	127	134	128	132	131	130	123	131	125	114	116	124	124	121	146	138
Tr_124	130	109	132	119	125	127	119	114	126	109	115	130	122	124	123	119	107	131	125	119	103	122	122	124	114	136	130	104	118	119	125	123	100	125	126	128	120	115	128	113	115	113	114	120	114	118	113	130	122
Tr_125	98	99	114	125	111	133	101	110	110	103	123	118	120	128	113	119	115	117	119	117	113	104	106	134	122	110	110	100	116	125	111	125	116	119	132	140	126	127	114	113	121	111	120	114	122	106	95	118	114
Tr_126	119	110	127	118	114	124	118	125	131	126	114	111	135	121	108	106	120	120	130	112	106	119	115	123	127	127	127	129	109	118	118	120	123	122	113	121	117	112	129	120	126	104	121	115	127	127	116	129	127
Tr_127	127	116	113	126	120	122	110	113	113	130	124	115	119	131	118	116	126	120	122	118	126	121	105	113	127	107	121	115	121	118	112	132	101	126	121	127	121	108	109	118	104	112	121	129	111	129	106	119	123
Tr_128	104	111	122	129	111	133	109	104	122	113	127	122	114	116	115	109	113	115	131	111	129	114	128	112	114	122	116	110	120	131	121	111	104	113	122	126	128	121	126	123	123	125	108	126	122	112	107	132	118
Tr_129	120	117	118	137	111	131	113	126	116	121	113	128	114	120	119	105	111	101	117	97	131	116	118	118	108	114	102	112	112	139	119	113	106	107	124	124	126	117	118	131	123	109	108	116	108	120	119	128	120
Tr_130	126	113	124	115	113	131	117	116	122	121	113	122	120	132	123	115	119	117	127	103	115	118	124	132	124	110	132	116	110	127	131	111	118	131	122	118	122	129	116	123	119	107	114	122	122	120	105	138	122
Tr_131	119	120	129	132	114	122	112	115	123	126	134	119	123	125	116	122	128	114	124	118	130	123	123	117	129	129	115	119	123	142	110	126	115	118	121	109	129	114	113	120	124	118	115	121	117	119	108	135	113
Tr_132	126	121	126	129	109	115	117	130	124	119	111	112	120	114	127	101	109	115	127	97	117	104	120	116	116	114	96	118	112	117	119	109	104	107	118	96	116	115	104	107	113	105	108	116	114	112	121	122	120
Tr_133	117	132	141	138	128	134	128	143	123	130	128	131	133	131	126	118	136	128	134	112	132	121	125	135	119	123	129	133	131	146	130	130	129	132	137	129	133	138	123	136	128	130	129	123	131	161	134	133	157
Tr_134	128	109	114	109	115	131	115	112	110	111	109	114	116	108	125	107	101	123	117	111	111	102	118	124	112	122	102	106	108	105	113	119	104	119	128	120	112	105	124	113	117	111	112	108	114	108	101	118	106
Tr_135	109	116	133	116	112	98	114	119	129	122	112	123	121	111	114	100	100	108	118	110	118	111	115	113	105	123	111	117	97	130	120	118	113	122	113	113	129	114	115	116	130	122	95	103	115	123	104	125	123
Tr_136	113	116	125	118	104	112	122	99	135	108	128	111	117	109	108	96	108	116	124	94	114	105	125	115	109	113	115	109	115	124	108	112	115	106	115	117	131	110	115	102	112	110	97	109	115	117	98	125	119
Tr_137	118	119	128	125	115	129	115	120	122	111	119	120	124	120	117	119	103	117	131	117	115	104	136	138	120	116	112	120	104	115	113	119	120	125	130	136	122	117	104	123	131	111	110	118	120	118	97	136	100
Tr_138	108	101	126	121	113	121	105	112	110	105	117	114	110	118	117	95	95	103	125	109	107	100	118	114	108	108	98	108	112	125	101	107	114	103	124	126	108	105	98	103	107	107	106	108	114	112	107	116	106
Tr_139	114	105	104	111	105	125	113	124	108	111	99	118	120	106	111	97	101	101	119	103	107	108	112	114	100	118	108	102	100	119	111	117	102	111	112	128	108	113	122	119	105	107	106	98	108	124	99	108	122
Tr_140	113	118	113	126	108	134	126	105	121	110	110	127	117	115	100	114	122	112	124	108	124	115	111	131	121	119	103	111	97	112	114	118	111	112	125	125	113	120	113	120	102	110	107	113	111	117	104	139	121
Tr_141	113	106	115	122	114	122	118	115	115	108	118	113	95	121	110	104	112	110	110	114	124	121	115	131	113	111	99	121	113	124	116	112	107	108	127	109	123	116	111	106	110	126	101	117	115	123	106	121	127
Tr_142	133	128	125	128	124	126	122	125	125	114	112	115	127	117	128	118	106	112	120	106	134	107	109	121	115	121	95	123	121	124	106	108	101	102	131	117	105	118	107	108	122	126	123	133	119	125	122	127	125
Tr_143	111	116	113	138	114	122	106	105	125	116	116	115	109	127	122	110	120	118	112	130	136	117	131	127	127	103	115	109	113	138	116	110	105	106	135	133	135	130	101	120	114	122	125	121	129	123	100	133	133
Tr_144	127	124	127	120	120	122	128	131	117	122	102	117	121	105	118	102	126	120	140	110	128	113	125	125	127	121	107	121	117	128	130	114	123	112	119	129	119	128	115	126	118	122	111	123	117	125	118	131	123
Tr_145	123	122	135	118	130	126	138	133	133	122	124	137	125	123	134	110	128	122	146	124	126	137	133	147	141	125	121	147	131	150	136	148	121	142	129	137	137	132	129	132	136	128	133	129	133	143	126	115	123
Tr_146	108	99	102	125	107	131	105	110	120	111	109	124	126	130	107	111	109	109	125	115	119	102	116	112	116	114	112	112	92	133	107	117	108	125	136	134	106	121	112	129	117	109	104	112	122	122	99	130	120
Tr_147	117	124	125	126	104	136	116	123	127	112	124	111	121	133	122	122	112	112	130	108	128	113	127	115	121	117	103	125	121	134	112	98	117	100	133	125	115	118	127	124	118	130	109	129	125	129	114	147	131
Tr_148	118	127	138	127	115	137	129	124	122	125	129	128	132	138	125	129	113	121	143	123	139	128	136	110	122	120	118	124	140	145	127	109	118	109	126	126	122	129	134	131	109	125	120	134	134	130	119	142	134
Tr_149	115	114	123	114	112	132	102	111	117	102	126	117	113	143	120	124	114	124	136	112	112	123	137	103	115	107	111	127	121	142	128	114	115	116	123	127	117	118	113	122	114	122	113	123	119	121	122	137	127
Tr_150	126	119	132	129	97	131	117	118	132	117	131	120	126	120	109	111	101	103	133	105	125	116	122	128	114	124	108	100	108	139	117	121	110	115	124	112	122	123	114	119	121	109	104	122	118	120	111	124	124
Tr_151	113	104	139	126	120	118	108	125	121	116	124	121	111	119	120	104	114	138	114	106	124	121	115	135	115	115	117	109	113	126	114	112	111	114	103	121	123	124	109	116	116	112	115	123	123	109	112	117	105
Tr_152	105	104	123	120	114	132	110	115	117	120	118	117	113	111	128	116	100	106	120	122	124	117	129	125	113	125	115	109	129	138	130	126	101	104	129	123	125	118	113	108	100	116	105	115	99	105	104	131	115
Tr_153	105	120	113	134	98	126	108	115	129	108	112	111	119	125	124	128	130	118	112	118	122	119	123	131	119	123	113	99	115	110	112	116	115	110	135	113	137	122	115	110	116	116	117	129	123	129	114	131	127
Tr_154	115	116	123	120	114	120	112	119	137	120	114	107	117	123	122	108	104	104	110	116	110	109	131	113	121	115	101	121	121	136	116	112	103	108	125	125	117	134	131	116	106	116	123	117	127	113	116	135	125
Tr_155	123	118	111	122	112	122	100	127	123	110	108	111	121	121	108	98	110	108	118	110	106	113	99	123	133	121	99	125	107	124	124	120	119	124	109	127	115	102	123	108	110	108	115	117	127	117	116	127	121
Tr_156	105	118	125	120	100	130	112	105	121	106	122	123	121	125	116	110	104	104	126	102	122	113	115	119	103	121	107	109	109	138	110	118	101	108	125	123	133	112	117	118	116	112	101	111	123	117	90	119	103
Tr_157	116	123	114	115	113	119	119	118	120	117	123	116	124	120	111	105	113	111	123	105	113	110	108	120	122	114	104	114	118	121	105	99	126	109	122	118	138	105	114	113	125	111	98	114	114	124	103	126	116
Tr_158	107	104	129	128	104	122	126	111	117	110	126	105	117	119	124	116	106	108	118	102	122	107	127	131	115	125	105	109	111	116	106	118	101	108	123	113	123	114	117	108	124	112	103	119	135	123	98	113	121
Tr_159	115	126	149	122	126	120	112	123	119	116	134	127	121	133	124	130	124	138	136	120	132	131	131	131	123	131	127	131	115	144	128	136	129	136	129	119	133	130	121	120	114	142	123	129	119	131	116	131	135
Tr_160	99	96	115	126	104	112	112	123	107	112	104	105	113	109	108	114	104	104	112	122	124	111	103	121	111	109	105	119	107	120	116	108	101	118	125	121	131	110	105	112	106	110	121	97	115	121	102	121	119
Tr_161	101	112	119	142	126	124	112	125	121	128	124	123	109	123	142	138	118	114	132	130	136	133	135	141	125	111	125	111	127	136	138	122	121	118	141	141	131	148	125	124	106	108	121	119	129	115	112	123	115
Tr_162	106	105	132	121	111	131	107	106	116	115	111	126	132	122	111	99	113	121	125	121	125	112	116	112	110	136	110	122	118	149	111	121	118	109	134	126	120	113	122	121	113	107	106	100	112	116	101	124	126
Tr_163	114	117	130	123	127	147	113	118	120	131	131	120	120	124	117	121	111	127	133	125	115	112	124	114	118	134	114	118	120	135	137	123	120	123	144	132	124	125	128	131	117	119	118	126	118	126	119	142	124
Tr_164	113	114	119	128	114	134	102	109	125	112	124	111	129	129	108	116	116	126	142	114	142	115	113	113	109	131	113	119	115	138	120	114	121	110	125	131	135	128	125	136	128	126	101	121	131	129	110	139	121
Tr_165	130	119	134	123	117	123	123	112	124	121	129	128	132	128	129	127	115	123	139	117	141	116	112	132	128	138	120	128	126	137	115	131	120	123	142	144	120	121	132	129	123	131	126	128	126	128	129	138	144
Tr_166	111	116	113	128	98	122	130	119	129	104	116	119	127	131	130	112	116	122	130	116	132	117	115	133	127	127	113	135	123	146	118	122	115	130	139	133	129	116	123	118	114	114	121	105	125	119	112	121	127
Tr_167	102	115	124	123	107	127	107	108	126	105	113	114	110	120	115	101	105	113	129	103	133	112	108	110	104	124	94	120	120	131	115	113	110	101	128	128	128	113	110	121	109	115	102	108	106	116	111	134	122
Tr_168	103	122	103	136	102	132	110	111	135	116	124	121	121	127	122	120	116	114	138	138	134	109	117	133	123	129	105	113	119	148	138	122	129	110	133	143	131	138	121	118	112	120	127	125	115	121	108	121	127
Tr_169	117	116	121	122	104	120	118	117	121	114	118	123	119	121	138	114	116	128	116	134	120	121	107	137	127	121	111	125	123	122	118	108	117	108	135	131	127	126	131	112	112	116	119	125	113	117	120	131	125
Tr_170	96	111	120	117	97	121	117	128	124	119	109	112	116	112	111	121	121	111	123	121	119	108	118	130	126	114	112	120	116	129	119	121	116	119	124	122	128	115	116	113	115	115	116	112	98	124	103	114	118
Tr_171	110	121	114	115	113	119	111	124	122	109	113	116	110	108	107	113	115	115	125	119	113	120	132	128	124	124	116	128	128	137	131	117	110	111	122	130	112	115	120	115	107	101	120	104	102	114	111	114	118
Tr_172	111	116	131	124	116	110	124	129	121	126	106	117	119	127	132	106	120	118	116	114	132	109	113	131	137	121	117	135	117	132	132	136	117	126	127	125	121	110	113	112	128	116	127	109	117	121	116	115	129
Tr_173	141	124	127	128	118	124	120	123	141	124	114	115	129	105	118	118	122	122	126	114	130	107	115	127	127	117	121	125	127	128	126	122	129	126	123	121	119	120	127	118	120	118	103	121	117	119	118	127	129
Tr_174	130	125	144	125	127	115	129	138	120	133	117	124	132	104	139	131	129	133	117	115	139	134	120	134	122	134	134	144	122	131	141	149	126	133	132	134	128	131	136	121	125	125	114	130	122	130	131	142	136
Tr_175	107	108	135	128	118	118	118	119	113	122	116	127	133	129	134	108	114	116	126	112	120	119	115	139	119	125	117	119	121	134	122	136	125	120	133	139	131	136	131	114	122	126	111	129	123	113	116	137	113
Tr_176	114	115	132	117	121	113	109	124	112	121	115	114	122	110	135	111	119	119	111	109	125	104	110	130	136	124	116	130	120	131	119	129	124	117	128	128	132	121	120	109	119	123	110	114	126	116	119	108	118
Tr_177	143	134	129	130	124	124	124	133	115	132	124	123	123	127	146	124	136	140	120	118	122	125	115	143	131	123	135	139	133	136	130	134	137	136	131	121	133	110	125	124	132	128	123	131	119	115	128	123	133
Tr_178	118	107	114	125	111	131	107	120	116	117	111	110	126	118	119	115	119	125	121	129	109	98	106	132	118	116	112	108	116	117	125	123	102	115	132	128	124	123	128	117	109	105	116	120	118	118	113	132	132
Tr_179	113	126	135	132	124	134	132	127	131	128	116	131	123	135	128	112	122	130	132	124	126	131	121	129	129	143	135	139	131	132	134	128	125	140	145	133	137	118	119	114	128	120	127	125	121	133	118	125	127
Tr_180	104	125	120	127	109	127	121	106	116	103	119	126	122	132	119	111	115	109	133	111	131	108	120	124	122	110	112	118	118	141	123	127	122	119	120	132	130	115	118	109	129	109	108	116	118	118	101	118	122
Tr_181	111	112	131	134	112	132	110	105	131	108	122	135	113	117	106	110	128	116	126	128	116	109	123	137	123	121	105	117	119	142	114	116	121	106	127	147	125	124	119	132	126	110	121	121	131	133	118	135	127
Tr_182	106	111	126	121	121	121	105	106	116	101	119	118	112	112	105	115	105	111	119	111	117	114	112	124	114	110	106	128	118	123	111	129	106	129	120	128	120	119	112	111	113	119	126	116	122	118	117	116	126
Tr_183	111	126	129	126	120	122	128	133	129	126	122	123	127	127	130	124	132	122	124	128	130	119	123	133	133	127	133	145	131	146	128	134	115	128	137	141	135	124	121	122	126	132	135	123	133	141	122	139	139
Tr_184	115	110	127	118	116	132	112	121	117	120	108	123	111	125	122	106	126	126	116	114	108	119	107	131	123	117	107	129	115	136	110	106	127	120	117	129	135	114	119	118	128	108	109	113	123	129	126	125	123
Tr_185	110	103	120	137	103	127	119	122	118	121	105	118	112	124	121	99	115	117	117	109	125	110	118	118	110	112	120	130	120	141	111	107	114	101	128	136	118	111	116	119	117	101	106	114	128	114	111	142	116
Tr_186	106	107	110	115	99	121	99	112	120	117	117	106	112	116	113	91	115	119	125	103	113	100	110	118	112	104	114	118	122	125	115	119	96	105	118	120	122	121	122	107	117	107	98	98	102	106	111	118	118
Tr_187	113	112	125	116	116	116	104	119	115	114	116	103	119	119	112	96	102	124	124	114	118	105	105	103	103	131	101	123	113	132	110	114	119	102	121	125	117	110	119	118	112	112	109	111	107	119	112	139	129
Tr_188	109	118	119	126	108	126	114	119	123	120	120	119	123	111	118	118	104	124	130	118	132	107	115	107	111	131	111	115	107	138	98	106	121	102	123	141	115	116	135	124	118	112	115	117	123	123	108	139	121
Tr_189	109	104	103	118	110	118	102	111	127	106	104	119	121	119	122	108	104	122	116	112	130	103	109	117	103	119	111	113	107	132	126	122	105	112	127	137	113	120	111	122	112	116	113	127	127	121	112	127	129
Tr_190	101	102	117	124	106	138	108	119	119	106	130	101	125	123	112	112	114	124	140	128	124	117	113	129	119	125	111	123	129	142	122	128	117	112	123	133	133	124	125	118	122	114	107	137	121	123	110	131	131
Tr_191	107	108	127	110	104	112	114	111	115	116	110	115	117	111	118	108	104	116	130	108	114	107	103	125	113	123	113	125	113	138	116	126	117	116	117	117	123	116	117	116	114	110	107	109	125	117	108	121	125
Tr_192	118	119	132	127	121	133	113	118	126	109	121	126	114	128	113	125	117	117	123	117	121	118	122	134	122	122	116	130	120	147	113	125	114	125	136	130	134	125	136	127	131	121	132	126	132	124	113	132	128
Tr_193	97	108	127	116	124	124	108	123	107	112	124	117	109	127	124	114	116	126	128	120	130	135	121	121	101	135	109	131	119	146	118	112	119	112	135	131	119	128	123	122	120	122	119	127	115	125	106	131	113
Tr_194	115	122	129	134	124	120	132	121	129	122	126	141	131	143	134	124	118	122	122	124	136	121	125	113	125	133	137	141	119	146	138	110	115	128	129	125	127	132	127	128	138	120	115	125	133	135	120	145	129
Tr_195	116	133	112	123	123	133	99	104	122	119	107	126	110	106	117	111	115	123	129	111	123	124	122	124	118	122	130	106	120	133	127	137	114	113	140	128	120	135	122	121	123	115	124	116	118	122	103	126	124
Tr_196	111	114	117	114	104	132	98	117	113	122	112	117	103	125	106	114	118	124	122	110	116	107	113	131	111	125	117	101	95	128	108	130	111	114	125	137	103	112	103	100	108	112	113	119	117	123	106	123	127
Tr_197	111	118	115	134	106	130	108	121	119	120	108	107	129	125	126	110	106	108	132	114	128	113	109	109	111	121	111	119	117	138	134	126	115	110	125	131	117	132	131	122	114	124	119	129	117	125	104	137	129
Tr_198	129	112	141	134	124	124	112	111	123	112	122	125	125	131	130	112	132	116	134	120	132	119	123	127	127	121	113	133	137	130	122	138	113	126	133	127	117	126	133	118	128	130	109	117	121	121	108	127	123
Tr_199	122	127	124	129	119	143	117	124	118	123	121	122	126	122	125	111	123	113	123	111	123	114	124	128	114	118	102	116	114	127	115	121	126	113	130	134	118	131	128	121	129	109	114	122	118	126	123	132	116
Tr_200	102	101	110	117	103	123	105	104	126	107	111	128	118	126	111	105	105	115	135	113	115	106	124	118	116	120	128	98	102	137	133	127	90	109	122	128	110	117	106	117	117	103	110	110	116	120	87	124	120
Tr_201	109	104	117	126	100	138	106	107	125	104	118	119	115	125	104	104	104	126	126	118	120	105	133	113	109	121	113	97	111	122	126	126	89	110	125	131	109	112	113	122	112	116	109	119	117	123	104	139	127
Tr_202	105	114	119	124	110	108	126	113	139	126	126	131	121	123	114	106	132	132	138	136	122	129	117	129	121	135	119	117	117	126	138	126	113	136	125	139	141	114	117	122	136	128	113	129	123	139	114	133	141
Tr_203	118	113	118	129	115	119	115	118	132	133	119	128	136	122	119	109	119	123	135	117	119	120	120	132	124	130	106	116	108	133	131	125	114	117	130	132	120	133	110	129	131	119	112	132	114	136	119	140	138
Tr_204	116	117	112	113	127	117	113	108	128	115	127	124	118	126	123	115	103	121	135	119	125	120	126	118	110	124	116	120	114	137	127	127	104	123	142	142	136	115	108	113	119	125	102	128	120	114	109	132	114
Tr_205	110	119	132	125	131	131	121	118	132	121	117	116	124	134	123	121	109	119	125	129	123	110	130	124	116	120	122	118	116	141	129	125	114	123	130	138	122	137	124	125	117	131	112	122	126	122	119	140	118
Tr_206	113	118	137	124	118	118	114	121	123	134	120	123	105	127	128	108	118	114	112	110	126	119	131	125	121	121	117	125	129	132	124	124	123	116	123	131	123	110	127	108	124	112	105	113	121	125	108	131	115
Tr_207	108	111	122	119	113	135	109	102	120	113	115	122	122	118	111	123	117	119	115	125	119	104	118	140	122	116	122	112	122	135	125	123	116	131	136	136	116	127	110	121	119	107	106	104	126	112	111	134	128
Tr_208	112	109	126	133	119	113	99	122	128	117	119	114	108	118	107	105	95	105	131	105	115	104	116	114	112	126	104	118	106	137	123	123	118	107	114	132	122	121	118	117	117	117	110	110	122	114	107	120	118
Tr_209	107	104	121	118	112	120	110	123	129	116	108	123	105	121	112	104	100	120	122	106	122	109	113	125	115	117	109	125	109	134	120	106	109	110	119	129	117	108	121	116	124	108	103	107	131	119	108	129	115
Tr_210	99	106	109	128	106	136	102	97	125	102	116	115	125	117	106	108	104	110	124	100	110	111	115	123	105	127	111	95	103	134	110	120	97	120	135	127	119	116	125	118	124	110	111	117	121	117	104	141	123
Tr_211	95	98	121	122	114	130	106	113	123	112	120	125	117	123	108	114	108	116	122	124	124	119	109	125	107	123	107	97	115	130	118	112	107	118	129	129	119	110	107	120	122	104	123	119	121	129	112	137	117
Tr_212	121	114	117	116	110	118	120	129	129	118	116	111	113	127	110	104	112	122	116	104	120	127	113	117	127	127	113	137	113	150	134	116	107	114	115	115	121	120	127	116	102	118	107	115	115	117	120	125	131
Tr_213	124	131	140	115	111	127	119	118	116	111	119	130	128	130	121	115	123	115	129	107	129	120	126	132	126	130	122	130	116	139	115	131	122	127	132	124	134	121	136	123	129	129	118	124	136	128	127	132	130
Tr_214	105	112	135	106	100	118	106	109	111	108	110	123	111	107	122	110	106	124	118	106	122	119	119	127	115	121	125	103	119	130	118	106	107	100	131	121	111	124	121	98	112	112	99	121	137	117	106	137	131
Tr_215	101	110	121	118	102	124	108	107	107	100	108	129	113	123	120	108	106	108	126	112	120	121	109	119	107	117	117	105	109	132	122	100	105	102	133	123	121	122	117	108	110	94	99	119	123	123	106	137	115
Tr_216	104	109	114	121	115	131	107	112	98	115	109	126	122	128	127	107	117	123	109	121	117	124	114	122	118	108	120	106	122	131	119	109	114	125	150	132	126	133	114	117	121	105	104	120	126	116	109	134	118
Tr_217	123	108	123	114	104	128	116	115	117	122	124	125	129	125	136	106	108	122	118	118	122	125	115	115	105	127	119	115	125	132	132	124	109	128	129	115	119	124	129	114	114	100	117	113	121	127	116	131	133
Tr_218	115	112	113	118	108	108	118	121	117	124	128	113	101	131	130	122	118	112	116	112	120	121	115	123	115	117	113	121	107	130	134	114	121	124	125	123	129	124	125	114	126	114	101	113	123	129	114	123	129
Tr_219	117	114	97	134	114	128	108	119	139	120	120	115	119	131	130	110	106	122	120	114	134	127	117	135	123	111	123	117	113	148	120	120	121	108	125	141	125	128	137	120	126	118	109	123	127	117	112	127	123
Tr_220	114	115	124	125	101	125	107	114	122	109	111	116	124	116	105	107	105	93	125	103	121	114	116	120	120	114	124	108	98	133	115	121	108	113	126	124	126	115	104	119	113	99	94	110	106	108	89	124	104
Tr_221	114	101	114	115	89	125	107	102	110	111	107	110	106	114	109	101	105	99	119	103	109	104	110	118	118	108	110	102	100	127	113	109	90	115	116	132	120	97	114	113	121	105	96	112	108	118	99	120	118
Tr_222	106	91	110	111	103	111	93	96	118	101	105	102	114	118	117	105	89	117	119	113	115	112	116	124	120	102	106	110	100	133	121	111	106	115	120	122	98	113	110	119	107	101	98	112	108	110	97	128	106
Tr_223	115	114	133	128	106	130	122	113	135	120	116	131	123	121	112	118	120	106	132	112	128	101	125	125	117	123	109	119	105	134	124	124	121	120	117	131	111	120	115	126	124	112	103	107	121	127	116	119	109
Tr_224	108	107	120	129	113	129	109	118	120	117	121	116	116	130	109	125	105	113	135	115	127	110	118	112	124	110	114	118	108	137	115	113	102	115	118	138	120	121	124	129	131	123	108	118	114	114	105	128	112
Tr_225	103	108	115	138	116	124	120	107	117	116	120	95	103	113	118	110	110	114	124	112	122	109	115	123	113	113	121	133	121	138	120	110	117	112	111	133	127	118	125	120	114	114	119	121	117	119	114	119	123
Tr_226	99	90	115	124	104	112	102	101	117	104	118	115	103	129	96	96	108	102	110	104	124	101	97	115	107	113	101	113	105	120	116	114	97	114	119	127	107	110	103	108	106	108	101	99	117	113	96	123	119
Tr_227	107	110	125	118	120	120	112	111	127	120	118	127	121	137	130	112	106	108	128	112	118	115	119	121	129	127	125	113	105	142	130	124	115	128	123	133	123	128	103	104	116	106	107	121	121	121	116	123	125
Tr_228	119	106	139	128	126	110	114	117	117	114	106	115	119	111	126	112	100	124	120	106	122	119	111	135	113	115	129	123	117	124	130	122	121	118	123	123	113	124	115	116	116	116	99	125	127	127	114	133	127
Tr_229	126	111	142	129	115	131	127	128	134	127	117	136	140	130	133	115	109	113	131	121	119	116	112	136	134	120	114	118	116	121	127	131	122	129	134	138	128	133	116	119	127	111	110	118	124	118	121	128	120
Tr_230	130	121	134	125	123	123	123	118	134	127	119	118	128	122	127	115	101	117	131	115	127	112	130	120	130	136	120	126	106	127	129	133	122	121	126	132	126	121	118	121	125	127	106	136	126	120	115	120	122
Tr_231	99	104	105	116	102	122	104	105	111	106	106	127	129	125	114	108	102	110	124	112	118	105	113	125	111	125	117	113	109	138	116	134	117	114	125	127	115	116	123	116	124	104	99	101	127	113	90	119	111
Tr_232	124	115	118	129	113	133	125	118	122	119	121	124	136	132	129	119	109	123	137	121	127	110	126	124	132	126	130	116	120	123	129	125	122	127	124	130	126	121	114	119	115	119	108	120	118	118	105	118	122
Tr_233	105	110	125	126	110	134	110	119	131	118	124	125	111	129	120	118	96	118	136	106	130	109	117	119	111	119	113	113	105	136	120	118	113	124	131	127	123	136	117	116	124	112	115	111	117	127	114	131	127
Tr_234	116	131	140	123	131	113	123	132	124	127	115	136	118	122	117	115	135	123	135	121	135	136	130	140	136	142	134	142	126	151	145	139	132	137	136	138	134	123	116	123	127	125	126	120	122	134	123	124	132
Tr_235	123	124	137	142	126	122	126	123	135	122	136	135	135	145	128	128	122	134	134	136	142	137	125	123	121	135	119	127	115	158	118	130	125	120	145	133	137	134	123	130	132	122	137	139	139	151	128	145	149
Tr_236	117	106	121	110	110	112	114	113	113	104	108	107	109	125	108	110	108	122	114	104	112	107	97	119	117	127	119	125	109	126	120	114	117	122	117	109	113	104	115	98	130	120	103	115	121	119	114	135	123
Tr_237	128	111	122	129	115	115	109	122	110	111	107	118	120	108	113	105	123	127	131	113	129	122	108	132	128	128	116	126	116	137	119	111	124	107	130	130	124	121	122	119	125	115	118	130	126	134	119	138	128
Tr_238	122	109	134	119	105	109	117	108	112	115	117	108	110	106	117	85	109	115	129	117	111	118	112	108	120	110	116	118	116	115	131	121	104	107	114	118	134	109	110	113	127	121	100	110	100	126	117	132	126
Tr_239	115	116	111	128	120	114	116	125	127	122	116	131	125	117	126	108	112	126	118	112	126	129	123	127	127	133	133	133	111	148	140	120	127	118	123	119	129	128	129	124	126	116	113	125	125	135	118	113	137
Tr_240	109	102	115	114	110	126	102	115	113	116	98	99	115	117	118	102	114	114	120	102	114	107	103	127	125	113	105	105	113	120	110	112	105	110	121	111	105	110	111	112	114	108	109	105	115	125	102	117	129
Tr_241	126	123	124	127	111	123	125	122	124	111	115	118	116	114	133	113	111	103	111	113	109	114	124	114	122	116	114	120	124	125	125	117	118	115	126	108	136	117	124	115	131	111	108	112	116	112	107	122	118
Tr_242	131	128	129	124	126	120	130	127	123	120	110	125	121	117	138	122	112	118	128	124	110	125	117	125	137	121	135	121	123	134	138	130	139	128	131	127	129	134	135	120	120	122	119	117	125	121	126	135	125
Tr_243	114	107	114	115	91	115	93	104	126	109	107	114	104	116	101	97	107	109	121	109	119	106	102	104	112	120	108	118	122	135	119	111	106	89	106	114	118	115	110	123	105	107	104	104	106	116	97	122	116
Tr_244	114	121	118	119	117	127	103	116	112	115	105	124	112	116	125	115	113	109	121	113	117	118	116	130	122	116	104	114	118	141	111	117	120	109	138	134	126	123	102	109	117	99	118	110	132	116	121	114	112
Tr_245	133	126	127	126	122	132	116	117	115	102	122	125	119	135	122	134	120	112	126	124	120	127	123	133	123	125	131	115	145	140	132	132	133	120	131	131	123	126	125	108	104	120	109	119	119	117	112	131	117
Tr_246	104	99	108	121	103	111	105	106	108	103	105	106	102	120	101	107	105	97	121	111	113	114	110	114	118	112	106	116	108	135	119	115	106	105	120	112	108	115	106	99	99	97	102	94	108	116	101	116	122
Tr_247	117	108	131	136	124	122	114	121	121	112	132	125	125	131	112	120	122	118	130	116	136	123	121	143	123	123	113	123	121	144	124	116	125	104	111	131	135	122	127	126	126	118	117	119	119	119	116	125	121
Tr_248	102	109	134	135	109	121	103	114	110	115	101	114	116	116	131	99	105	105	111	111	109	116	118	116	102	118	116	114	114	123	115	121	118	105	126	124	128	129	128	105	107	105	102	110	122	122	113	128	120
Tr_249	121	130	135	118	118	114	124	129	121	134	124	127	113	121	124	118	124	118	126	124	118	123	121	121	135	115	121	121	107	138	144	122	131	126	121	121	127	122	121	126	118	120	125	115	111	121	118	127	137
Tr_250	120	115	134	131	113	133	117	128	124	123	117	130	114	120	117	117	113	117	121	115	117	128	128	126	118	126	112	124	126	137	133	123	130	109	122	124	126	129	118	115	113	101	104	122	116	112	121	134	118
Tr_251	122	113	132	131	119	133	125	122	128	119	125	120	122	116	121	117	119	125	135	121	131	112	130	122	126	134	122	136	124	135	113	125	124	115	130	140	126	113	128	143	129	127	118	114	134	132	109	128	120
Tr_252	128	141	140	141	137	121	131	130	134	145	129	124	124	120	119	129	141	125	133	135	129	142	126	134	136	132	140	148	130	159	129	143	144	139	118	130	142	123	140	135	139	137	130	118	134	144	129	136	130
Tr_253	121	120	135	124	128	122	118	125	121	126	114	133	121	119	124	118	128	116	132	124	108	119	125	131	119	119	129	129	129	140	124	132	129	122	127	127	135	130	127	120	132	128	125	115	125	129	124	127	117
Tr_254	112	113	136	129	117	125	105	124	118	115	105	120	118	112	115	109	119	119	119	107	127	114	100	132	114	124	114	124	118	141	119	127	114	105	130	134	136	125	122	115	119	119	112	124	132	124	115	126	126
Tr_255	113	102	121	126	120	120	110	125	127	120	114	127	121	125	116	104	106	124	124	110	118	113	117	123	111	131	119	125	113	142	126	116	117	110	127	133	121	126	133	122	114	126	113	117	115	119	124	125	129
Tr_256	111	106	127	128	102	112	116	113	121	112	106	123	111	125	102	106	124	122	126	124	114	107	105	115	125	119	121	131	115	142	132	132	119	118	117	133	119	130	119	120	112	108	115	117	115	121	114	143	131
Tr_257	112	121	138	131	119	119	111	112	120	123	121	122	108	118	117	115	127	119	105	119	129	110	108	116	118	118	126	122	118	145	123	123	116	127	140	128	130	129	108	127	121	115	112	120	122	116	121	126	106
Tr_258	110	105	130	121	109	99	115	112	118	107	125	112	112	118	107	105	115	115	123	105	117	114	114	112	120	114	118	124	118	143	121	123	118	99	116	118	120	121	112	115	119	113	98	116	112	112	95	128	114
Tr_259	113	102	107	126	112	118	114	121	113	114	114	117	101	129	120	114	116	116	124	104	120	117	109	125	125	125	117	125	123	134	128	120	113	114	125	123	123	104	113	120	124	118	103	111	113	121	112	119	127
Tr_260	116	101	130	129	111	107	123	106	108	107	111	108	110	120	111	103	117	111	113	113	115	106	104	122	124	120	104	126	122	135	107	113	114	113	122	112	128	107	110	115	125	107	106	110	112	118	111	128	120
Tr_261	115	112	125	128	116	128	118	127	123	124	120	125	113	125	136	112	110	116	118	108	122	127	113	123	123	117	121	127	119	144	124	106	121	110	129	123	137	110	123	122	124	130	107	123	119	125	112	123	125
Tr_262	129	132	139	138	120	114	132	123	119	136	120	123	131	109	134	112	124	120	128	128	136	119	125	121	131	125	133	143	125	138	130	120	119	134	113	123	135	122	125	120	136	120	131	113	123	123	120	125	127
Tr_263	117	116	143	126	122	134	116	125	123	120	120	121	129	111	130	128	124	124	132	112	126	111	125	125	117	115	129	125	127	142	124	128	111	118	123	129	123	134	129	116	110	114	121	113	129	117	124	113	125
Tr_264	129	114	119	138	118	136	114	125	127	126	124	103	123	133	122	120	114	116	128	128	130	113	115	95	105	131	107	125	123	140	124	114	99	108	127	125	131	136	125	128	122	122	123	115	117	135	112	143	137
Tr_265	115	88	131	120	96	108	108	101	109	106	108	115	119	119	116	106	102	102	122	108	118	109	101	123	121	119	107	107	115	136	114	108	111	112	111	123	119	122	107	102	108	98	95	103	111	109	98	121	113
Tr_266	113	102	107	126	112	118	114	121	113	114	114	117	101	129	120	114	116	116	124	104	120	117	109	125	125	125	117	125	123	134	128	120	113	114	125	123	123	104	113	120	124	118	103	111	113	121	112	119	127
Tr_267	117	98	127	116	100	112	102	109	111	98	108	111	125	121	120	100	118	124	116	98	108	107	95	119	115	121	115	113	109	134	114	110	123	102	123	121	115	124	111	104	114	100	99	119	115	121	104	123	111
Tr_268	128	113	138	119	123	135	109	114	122	115	125	136	124	118	131	121	107	127	129	121	111	118	118	126	130	134	132	116	124	141	131	123	124	119	130	148	124	129	118	115	125	111	112	112	130	104	117	134	112
Tr_269	112	113	118	123	113	117	109	108	120	125	117	128	118	132	115	117	115	99	137	125	125	114	116	118	130	122	106	124	128	151	119	113	122	107	128	128	126	129	124	127	119	105	106	108	122	112	105	128	114
Tr_270	113	106	121	130	102	122	116	115	115	122	94	115	121	115	120	96	96	108	128	116	116	113	115	121	125	127	115	115	111	126	116	118	121	108	135	133	125	112	119	122	120	104	99	115	119	119	108	121	119
Tr_271	108	97	112	123	115	119	111	114	116	113	107	128	122	130	119	113	101	115	123	125	123	114	104	122	100	128	116	122	126	143	113	119	114	113	124	132	112	125	128	121	125	103	124	116	128	126	117	126	132
Tr_272	122	113	122	117	117	135	111	108	116	105	99	126	114	130	105	119	107	117	125	97	125	114	108	134	126	122	104	106	114	139	111	125	118	115	126	132	120	119	116	111	127	109	108	112	122	132	111	114	130
Tr_273	123	108	115	114	110	126	118	119	107	126	114	117	111	125	118	102	98	114	126	120	116	109	113	117	121	123	111	123	121	134	114	122	125	114	127	127	131	126	127	126	118	108	111	113	127	119	116	129	127
Tr_274	114	109	110	127	119	119	109	120	110	115	117	138	116	128	129	121	125	129	123	107	121	122	112	144	128	124	120	116	118	143	125	129	122	119	132	128	130	133	132	113	127	111	122	120	122	122	127	120	134
Tr_275	132	117	126	119	105	127	115	116	122	115	115	132	138	114	129	117	103	109	143	117	127	118	118	120	124	134	132	130	128	133	129	135	118	123	126	132	124	129	130	125	123	113	112	118	134	108	127	142	114
Tr_276	114	99	122	121	113	113	99	116	116	115	111	112	114	118	121	101	113	117	131	113	127	108	92	120	124	126	118	120	116	139	121	121	110	109	112	134	120	113	118	123	123	109	98	116	114	120	107	124	118
Tr_277	108	107	110	103	103	113	97	108	118	109	113	110	110	114	103	101	113	113	123	97	113	118	110	118	118	118	108	114	122	135	121	119	104	107	118	124	116	103	116	115	111	109	106	114	112	116	107	122	128
Tr_278	111	116	109	106	116	104	102	109	109	128	96	123	111	113	116	118	102	112	124	100	98	109	103	123	111	127	115	89	119	134	124	136	113	116	125	125	127	118	113	110	122	106	99	109	115	117	104	115	121
Tr_279	110	101	118	109	103	119	103	104	102	115	113	110	114	130	123	109	105	111	115	107	109	106	90	120	108	118	108	98	122	117	107	109	108	107	114	130	126	123	118	111	121	107	104	118	114	112	105	120	112
Tr_280	122	117	122	117	117	127	113	110	122	117	113	128	128	118	119	115	113	119	139	103	123	132	116	130	140	124	124	132	110	143	135	135	120	133	128	128	128	123	126	123	131	123	114	128	138	128	127	132	136
Tr_281	129	130	133	124	128	124	114	133	133	126	118	119	117	117	120	130	130	118	134	120	128	117	111	127	133	125	127	123	121	142	132	132	137	138	119	125	123	130	133	124	132	112	129	123	129	131	114	125	125
Tr_282	102	115	120	113	113	115	99	112	110	101	95	108	94	112	119	113	111	111	115	99	131	102	102	114	106	124	120	122	112	131	129	129	106	105	122	116	110	119	104	109	101	117	106	114	122	108	105	114	116
Tr_283	126	113	122	115	111	123	115	126	120	123	117	108	102	118	109	117	115	113	113	113	119	110	108	112	118	122	108	130	118	121	117	123	118	113	120	134	126	123	130	117	121	119	116	124	126	116	127	128	124
Tr_284	122	123	130	127	121	127	129	122	128	125	117	122	116	116	117	121	127	107	119	107	119	118	128	110	134	128	108	130	122	143	127	123	136	125	140	116	134	123	108	127	121	121	120	104	122	118	123	128	124
Tr_285	107	108	125	106	108	124	102	111	113	112	108	115	111	121	106	112	114	100	104	100	112	91	91	121	109	115	105	105	115	124	118	120	119	106	123	121	123	124	117	102	114	104	103	117	115	113	96	115	113
Tr_286	113	102	135	116	108	124	110	111	109	112	104	121	109	121	118	104	110	106	120	112	112	107	113	117	113	123	101	109	125	130	116	128	115	106	115	127	119	114	123	114	108	106	115	111	107	113	104	123	119
Tr_287	120	119	124	137	117	115	127	126	116	129	117	126	108	118	117	113	101	111	119	123	131	132	116	110	124	130	120	128	118	131	125	119	120	109	132	138	130	115	122	113	113	115	124	108	122	118	117	138	132
Tr_288	111	112	109	124	116	130	104	115	113	114	124	101	97	119	110	98	112	120	118	92	118	105	107	101	123	115	113	117	125	136	122	114	103	102	117	123	105	114	115	114	118	116	109	113	113	107	104	125	119
Tr_289	122	113	120	117	97	123	117	106	120	101	113	114	134	108	103	107	111	113	127	101	117	110	106	122	108	124	108	104	112	129	115	135	102	105	112	128	116	113	128	115	111	107	110	104	112	114	111	124	120
Tr_290	125	132	127	128	110	124	102	123	125	114	120	109	115	121	112	108	112	110	120	108	126	109	111	119	113	127	113	119	111	134	110	130	119	112	111	119	129	114	119	114	118	106	109	109	115	117	108	117	123
Tr_291	117	120	125	124	114	128	96	111	113	114	114	127	101	109	108	116	120	122	132	110	126	113	119	111	113	125	113	117	115	140	124	120	109	114	115	125	111	112	117	112	116	112	103	117	129	115	108	133	125
Tr_292	132	123	124	123	121	123	125	118	122	117	103	122	122	114	113	101	121	111	111	115	117	116	108	112	130	112	122	128	112	133	127	109	124	123	120	116	122	111	114	119	131	111	106	116	122	126	109	128	130
Tr_293	137	122	123	122	112	126	116	119	121	126	106	115	129	119	100	112	124	118	132	120	118	103	107	109	125	125	113	119	117	118	122	116	117	118	125	137	117	116	119	124	120	108	115	127	111	117	104	127	111
Tr_294	138	135	134	133	127	135	125	128	134	129	119	132	124	114	125	125	125	125	117	127	133	128	130	126	128	130	126	130	148	137	135	123	132	121	134	130	128	143	136	121	121	127	130	120	130	144	133	128	140
Tr_295	129	120	129	124	124	134	122	123	137	118	122	121	119	127	116	118	114	114	124	108	122	117	119	131	129	125	117	117	111	140	132	128	125	122	131	129	121	126	127	114	122	116	117	129	119	117	116	123	137
Tr_296	134	133	130	127	127	129	137	130	136	143	127	134	132	126	133	113	125	133	125	117	131	114	130	124	134	124	142	134	116	131	139	137	120	131	140	132	124	135	126	125	123	119	130	128	140	124	119	118	132
Tr_297	121	108	127	126	108	126	112	119	127	100	94	121	115	105	106	106	110	104	124	102	120	103	109	115	117	121	107	121	105	138	124	118	117	116	109	121	103	128	111	120	120	96	109	103	117	117	102	125	109
Tr_298	126	115	134	129	121	115	123	118	128	129	103	110	114	110	127	101	115	123	121	115	125	120	122	126	122	126	118	126	114	135	135	123	118	125	132	126	126	107	106	117	123	117	118	132	118	126	113	126	124
Tr_299	115	110	111	116	112	128	110	111	117	114	116	125	119	115	114	112	104	100	128	106	130	111	119	113	119	119	91	105	99	126	112	110	107	110	123	113	113	114	127	116	122	112	101	111	119	115	98	115	123
Tr_300	126	107	126	117	125	123	117	120	130	131	105	118	122	106	121	111	121	111	135	101	117	110	110	118	134	132	120	128	106	137	125	129	112	125	134	118	112	119	120	121	117	101	116	116	112	124	113	126	128
Tr_301	124	117	132	125	117	133	121	112	124	127	121	128	124	116	129	111	113	113	131	115	125	112	118	118	124	126	118	122	120	137	123	127	118	127	128	110	114	127	130	127	125	107	112	104	128	106	113	126	122
Tr_302	106	103	122	113	95	125	111	110	116	115	111	116	110	112	123	101	105	117	113	99	109	98	104	130	122	130	104	102	106	119	119	115	114	109	112	112	116	101	110	105	115	107	106	114	106	112	97	116	120
Tr_303	106	99	132	113	107	121	109	92	106	103	103	116	104	128	103	99	107	115	117	105	113	92	102	120	104	118	112	102	102	123	115	117	102	109	108	110	106	117	108	91	103	99	94	106	114	112	87	120	118
Tr_304	139	134	135	134	146	132	134	145	135	138	120	133	139	121	134	138	130	122	134	124	136	125	127	153	141	143	119	131	131	144	134	142	139	134	145	145	131	124	125	130	132	136	127	125	147	129	130	109	125
Tr_305	112	97	112	119	105	127	111	118	120	115	111	116	120	122	123	107	99	105	127	103	115	96	98	116	114	124	104	104	102	123	121	117	98	107	114	122	110	113	120	117	105	121	106	116	114	100	105	114	118
Tr_306	114	117	122	131	121	135	133	124	136	127	119	130	128	126	135	117	121	129	135	125	125	124	136	136	120	130	128	134	124	135	141	125	114	133	138	126	132	139	116	129	117	121	132	132	130	138	111	132	134
Tr_307	114	119	122	121	119	119	117	114	114	127	121	130	120	120	131	111	125	117	131	113	115	124	104	138	128	130	108	126	120	129	133	129	126	129	138	140	130	135	116	121	123	111	120	122	130	126	119	128	136
Tr_308	117	112	115	134	114	122	126	103	117	120	128	123	105	129	120	114	114	122	130	108	116	121	121	119	123	115	113	119	123	136	132	130	109	110	127	131	121	122	117	126	114	122	107	123	127	99	114	133	117
Tr_309	112	117	128	135	121	133	121	124	128	119	121	136	120	138	123	129	121	123	115	123	119	124	126	130	122	120	128	116	128	153	125	131	120	113	140	146	122	133	132	129	105	103	134	128	132	114	117	134	122
Tr_310	116	105	130	131	119	129	105	116	124	117	115	130	114	132	119	109	111	121	113	113	113	104	120	126	114	104	120	110	102	129	115	125	122	121	118	132	126	127	128	111	127	113	104	134	126	120	109	138	120
Tr_311	120	131	122	115	109	121	109	108	122	119	103	128	120	122	117	113	117	111	115	121	131	110	118	136	124	126	128	126	118	123	123	123	122	121	126	128	122	119	116	117	121	105	114	118	124	120	111	126	126
Tr_312	130	129	120	127	111	129	121	112	124	113	113	124	120	122	115	111	119	127	137	115	129	112	112	132	134	126	122	124	122	137	113	125	116	119	122	132	112	115	124	127	127	103	112	108	122	112	103	128	102
Tr_313	130	125	130	125	135	137	125	136	126	129	133	124	126	132	139	127	127	135	105	129	115	136	142	134	136	128	138	120	132	133	141	145	128	125	134	126	138	129	136	123	127	137	126	136	132	136	125	140	132
Tr_314	115	120	117	144	112	132	122	105	115	116	126	117	127	137	116	106	118	126	126	126	128	109	117	129	119	117	123	119	125	130	122	116	115	108	123	125	123	120	123	126	134	116	115	117	127	115	100	141	121
Tr_315	113	106	113	124	96	142	104	107	129	102	120	127	125	125	110	112	104	100	126	112	122	105	119	123	117	119	105	111	111	126	124	118	111	112	129	129	115	124	127	116	128	104	99	113	123	119	102	143	123
Tr_316	126	111	114	133	107	133	109	112	136	115	123	116	132	116	117	113	121	121	133	119	125	114	130	124	130	110	114	116	122	139	115	119	102	105	132	136	118	125	122	131	117	109	116	120	114	128	113	130	128
Tr_317	106	117	116	123	109	125	123	112	124	107	113	128	116	128	117	107	111	113	115	115	115	110	114	124	122	120	120	130	126	133	135	111	112	113	134	114	112	117	110	111	115	103	116	108	128	112	111	136	112
Tr_318	116	105	126	113	101	143	101	104	118	97	113	120	122	128	111	103	107	117	129	99	111	104	122	112	108	112	104	98	112	127	111	123	98	107	130	134	104	127	120	123	127	107	96	116	126	116	97	142	120
Tr_319	109	124	121	126	102	118	104	119	121	112	100	127	111	111	114	118	106	104	118	112	128	113	123	117	115	103	109	123	113	134	126	112	115	104	119	115	115	124	107	112	122	102	107	117	111	109	112	131	111
Tr_320	109	116	119	116	106	128	112	109	121	114	112	115	111	119	108	112	118	134	124	110	120	105	115	123	117	119	105	111	119	126	118	128	109	124	129	135	127	120	123	116	126	120	95	121	123	113	106	121	129
Tr_321	124	117	136	121	117	127	129	116	112	103	129	120	136	146	125	111	113	125	127	131	137	128	124	130	124	142	128	120	134	137	123	131	116	121	136	130	144	115	120	125	121	131	126	120	122	118	99	136	120
Tr_322	96	109	114	121	89	125	109	96	108	107	111	122	114	106	101	101	101	103	117	113	105	118	118	108	126	102	110	104	100	125	111	111	108	113	122	114	114	105	100	109	109	93	92	104	108	112	101	120	106
Tr_323	114	113	124	121	121	125	121	116	116	107	127	124	110	122	113	111	107	111	125	107	117	108	124	128	126	112	108	114	124	143	123	125	118	111	114	130	124	109	114	111	115	113	120	112	114	102	103	114	106
Tr_324	106	101	114	105	109	117	117	110	110	103	115	116	126	118	109	101	99	113	119	111	103	114	116	128	114	110	112	114	118	129	123	115	116	117	120	122	110	113	110	115	119	109	102	112	122	122	111	108	126
Tr_325	108	111	122	115	121	135	123	100	116	111	103	130	134	124	117	121	103	115	131	113	123	118	126	124	122	116	120	124	118	131	119	131	110	135	122	144	132	121	124	129	135	125	116	112	130	112	101	118	118
Tr_326	111	116	133	132	120	124	142	125	127	130	122	135	131	133	126	120	108	118	120	118	120	125	127	131	135	123	141	139	111	140	132	122	123	130	123	125	137	122	129	126	128	132	121	129	133	121	116	123	117
Tr_327	106	99	132	113	109	125	121	114	118	115	115	134	122	136	119	125	107	115	127	115	119	116	112	128	130	122	114	114	116	141	121	119	122	123	124	124	124	127	126	115	135	115	106	110	122	116	103	128	126
Tr_328	115	106	125	116	120	126	106	121	111	126	120	121	119	131	124	114	116	120	116	122	120	103	109	127	119	115	125	113	115	134	124	126	115	112	123	127	125	118	115	112	112	116	123	133	121	111	116	133	129
Tr_329	113	124	139	128	130	114	140	115	121	120	118	141	123	135	114	116	134	130	116	128	134	137	123	139	135	123	145	137	123	142	138	134	127	128	135	131	131	122	111	124	148	130	123	125	133	145	114	139	133
Tr_330	113	112	117	130	114	138	122	107	131	112	108	125	139	133	110	114	118	116	134	112	134	107	107	119	127	115	111	115	109	136	134	122	117	116	135	137	123	120	123	130	126	114	109	117	125	111	110	125	127
Tr_331	126	129	122	125	117	147	119	118	136	127	111	132	126	124	113	125	117	113	133	123	123	108	118	132	138	130	114	112	126	139	137	103	120	127	122	134	126	121	120	129	129	115	116	128	138	122	111	140	122
Tr_332	116	115	120	141	123	143	113	122	120	127	125	134	122	144	141	125	119	125	129	127	127	120	122	130	130	120	126	112	128	131	125	117	132	113	136	122	122	133	128	113	135	109	122	126	124	118	107	138	112
Tr_333	110	107	118	131	115	123	117	112	116	123	115	108	120	126	123	121	115	123	123	113	121	110	112	114	128	132	124	118	122	149	129	125	116	111	128	122	114	123	108	121	121	115	114	128	126	126	105	130	120
Tr_334	110	111	124	141	125	139	121	130	120	123	111	126	114	130	135	123	119	131	121	127	129	122	130	138	140	124	136	114	122	145	123	123	122	121	142	146	132	121	112	125	121	111	126	130	138	124	113	132	118
Tr_335	129	132	135	134	142	128	134	137	141	142	130	143	137	135	116	134	122	146	146	130	140	143	131	141	133	135	129	137	125	160	152	138	131	140	131	149	133	126	125	138	134	134	139	135	137	143	128	131	151
Tr_336	128	123	136	129	139	141	129	118	134	139	135	130	148	136	127	131	121	137	137	123	123	128	138	134	142	132	134	132	120	149	145	137	128	145	132	134	124	129	140	145	137	133	132	122	128	120	131	138	134
Tr_337	102	99	116	127	127	127	115	114	110	113	121	114	134	124	117	115	113	121	133	123	113	118	122	120	120	118	114	116	118	133	121	117	112	117	130	140	130	117	116	115	129	119	114	114	106	110	107	136	118
Tr_338	115	120	129	136	118	138	120	117	123	122	114	137	127	125	118	126	132	128	134	128	130	119	117	141	129	131	125	127	123	146	124	138	127	132	139	133	135	144	129	138	138	112	133	125	137	129	112	129	125
Tr_339	122	119	136	127	119	123	127	118	134	115	123	130	134	122	129	127	109	135	133	127	127	120	122	152	142	140	126	126	126	143	141	125	134	133	128	126	130	133	130	131	141	111	124	116	128	130	119	132	130
Tr_340	113	116	127	124	114	116	126	127	119	110	112	127	127	127	128	132	110	126	130	118	132	123	127	131	137	129	123	125	127	136	138	132	109	112	129	117	119	124	125	126	126	114	121	129	127	119	114	131	121
Tr_341	102	113	122	125	107	137	105	122	112	127	113	130	112	124	119	107	129	127	117	131	123	114	120	116	124	138	116	118	114	135	125	125	126	113	132	128	136	131	116	113	119	111	114	110	116	112	113	136	116
Tr_342	111	108	121	116	110	118	102	111	123	110	118	121	123	133	104	100	104	124	118	116	120	107	107	121	109	121	107	121	105	128	116	124	107	122	127	115	125	124	113	120	118	106	109	107	109	113	100	119	119
Tr_343	103	106	115	104	108	120	106	115	119	106	106	119	131	111	106	96	106	122	122	120	104	103	123	129	123	117	103	99	107	110	120	116	113	114	125	119	111	114	115	114	100	108	107	115	105	113	110	127	125
Tr_344	122	133	126	123	115	133	121	140	134	123	127	132	140	132	131	117	113	135	129	123	131	132	132	134	144	124	118	142	114	149	143	135	140	137	130	130	134	121	120	137	135	121	124	126	138	130	127	130	132
Tr_345	120	121	120	133	101	119	113	108	122	117	111	132	126	130	117	109	117	129	131	127	133	114	114	130	136	136	128	132	112	137	131	133	122	137	126	116	124	123	114	125	131	123	120	112	126	118	113	130	124
Tr_346	122	103	124	129	111	123	101	102	124	115	121	126	124	130	121	107	101	117	129	113	121	112	108	126	122	120	106	104	106	129	127	117	116	123	116	118	120	123	116	113	115	113	96	134	108	108	115	126	126
Tr_347	112	111	128	133	103	129	111	128	122	119	125	126	126	136	131	125	117	131	125	139	129	114	126	126	124	132	120	116	122	125	125	133	130	129	134	134	134	119	130	115	129	111	118	136	122	122	113	140	124
Tr_348	114	115	126	123	113	127	105	118	120	111	115	108	126	126	123	111	115	121	123	117	131	106	116	138	116	124	110	108	112	125	123	121	116	127	120	120	130	113	116	113	121	113	106	132	118	116	117	116	124
Tr_349	116	113	128	129	121	117	115	108	120	117	115	128	120	128	115	111	111	117	119	119	133	114	110	136	130	114	120	108	110	129	121	123	118	121	124	128	134	123	108	115	111	121	106	122	122	116	109	126	122
Tr_350	123	108	129	118	116	120	128	103	125	112	124	131	121	129	118	102	116	124	124	122	112	119	131	131	131	133	123	121	109	114	118	124	113	128	127	125	123	120	123	118	114	118	115	129	127	119	112	131	131
Tr_351	106	103	136	119	109	129	107	112	110	109	117	106	120	118	107	107	107	115	135	105	113	96	106	118	112	126	98	104	114	133	105	113	110	99	130	120	98	115	112	107	113	103	104	116	112	114	107	124	112
Tr_352	119	102	127	134	118	122	122	123	133	120	112	131	125	127	126	120	100	122	136	114	120	117	123	129	127	125	121	121	107	136	130	130	111	124	113	137	127	120	123	130	128	120	95	127	131	123	116	127	131
Tr_353	105	116	123	122	110	118	110	119	121	126	120	135	113	127	128	120	110	134	128	104	122	111	117	125	119	129	123	113	117	142	132	132	113	126	123	139	135	122	129	136	146	124	107	127	141	121	110	125	127
Tr_354	126	127	118	133	115	131	125	112	136	129	115	128	118	124	127	119	111	123	123	125	125	120	126	126	128	116	124	110	108	125	121	135	120	135	134	128	136	125	116	123	129	121	124	122	134	120	115	114	130
Tr_355	117	116	133	138	104	122	116	115	113	116	122	123	119	123	118	110	116	120	114	116	126	113	113	131	125	137	103	115	117	130	110	126	117	118	123	119	121	122	121	120	134	114	113	129	119	115	100	129	117
Tr_356	122	117	122	125	115	123	121	118	108	121	111	114	124	138	117	107	129	123	123	121	127	122	104	112	130	124	108	122	120	129	121	121	118	131	128	128	132	119	120	119	123	123	116	124	126	120	113	136	124
Tr_357	107	120	109	128	108	128	108	121	123	124	114	131	113	119	126	124	122	122	130	124	134	115	121	123	127	141	113	105	115	130	132	118	121	118	125	129	129	136	121	118	120	112	111	123	115	123	104	131	131
Tr_358	115	120	121	140	104	136	120	121	133	108	118	129	127	129	102	120	122	132	130	124	118	105	113	123	125	125	123	111	111	136	118	114	121	126	117	135	109	120	115	118	128	120	113	125	133	127	108	131	123
Tr_359	117	114	131	138	108	130	126	117	123	114	120	129	121	131	128	124	120	120	132	120	124	119	125	123	131	119	123	115	115	144	136	128	121	124	129	135	129	118	123	128	130	124	117	127	135	113	110	119	111
Tr_360	111	102	129	134	116	136	122	125	127	120	116	129	123	121	128	116	114	134	126	124	118	131	129	133	129	127	133	117	127	140	132	132	117	128	131	127	139	130	123	118	128	130	113	129	125	123	128	127	119
Tr_361	115	104	135	136	102	122	118	113	113	124	120	123	123	133	116	100	124	122	124	110	124	113	105	107	117	133	113	119	115	148	126	120	123	110	117	121	119	124	123	116	116	114	109	125	119	117	114	127	115
Tr_362	119	120	131	132	112	136	112	121	121	118	126	113	121	141	126	106	116	118	122	124	106	119	133	121	123	117	113	117	121	122	128	130	141	120	133	141	141	122	125	136	130	122	109	119	121	119	126	129	123
Tr_363	115	114	123	126	116	116	112	109	111	114	112	121	123	135	128	110	116	120	120	122	126	121	125	127	131	121	111	109	107	136	120	130	135	120	127	123	135	118	115	112	118	112	99	117	117	113	112	123	121
Tr_364	112	119	130	117	95	129	109	106	116	113	107	118	114	114	109	105	117	109	115	103	111	98	116	116	114	120	114	118	92	125	109	121	112	119	114	114	120	121	96	113	125	109	106	112	110	116	101	140	120
Tr_365	113	116	125	126	100	132	128	111	115	114	128	123	135	129	116	122	118	118	130	114	124	105	113	133	123	129	109	109	121	148	116	150	131	124	131	137	143	130	133	124	136	120	113	119	127	121	102	137	127
Tr_366	122	109	128	127	115	139	113	116	130	119	117	128	128	132	133	123	111	127	131	109	103	114	132	126	126	120	122	104	106	131	121	147	118	131	122	134	142	133	138	115	133	111	112	128	122	126	121	122	122
Tr_367	121	116	125	122	116	144	124	127	121	120	118	123	123	129	108	116	122	108	128	104	128	111	115	113	127	121	115	117	115	142	122	128	119	116	117	137	127	132	125	124	130	114	105	117	127	127	112	131	125
Tr_368	121	124	137	126	122	134	122	127	125	128	122	129	119	125	116	108	132	128	114	122	124	115	117	139	131	123	125	123	123	138	130	130	119	118	133	121	137	134	125	112	110	118	111	131	129	119	120	119	121
Tr_369	113	102	115	130	112	130	104	123	117	100	116	125	125	133	106	108	116	116	122	124	122	121	121	123	131	131	123	119	111	130	130	112	105	116	117	141	135	122	117	130	118	110	119	125	139	119	108	129	115
Tr_370	133	132	131	136	124	126	126	131	123	126	114	125	119	119	118	116	126	122	128	128	130	135	127	133	135	127	125	119	139	134	128	126	121	120	117	125	127	120	123	106	118	118	123	127	127	135	116	133	125
Tr_371	119	116	137	134	124	132	124	125	125	124	132	133	127	131	132	120	122	138	114	120	146	137	127	135	123	131	135	133	127	142	114	130	115	116	119	123	123	134	139	134	130	136	123	143	139	127	112	135	117
Tr_372	129	116	115	128	118	134	116	133	123	114	112	121	119	147	114	110	122	118	106	126	128	111	115	117	129	119	125	125	115	114	128	110	109	108	119	125	121	130	115	120	112	118	121	125	139	115	116	137	111
Tr_373	110	99	104	133	105	121	115	106	122	123	111	108	118	128	117	103	97	105	109	115	113	106	106	112	116	120	116	114	108	123	111	117	102	109	120	124	118	115	120	131	127	113	112	118	116	112	111	126	122
Tr_374	107	108	125	130	100	142	106	119	127	116	124	125	129	133	124	118	110	124	124	122	134	111	127	123	113	125	103	111	115	138	110	118	127	100	135	143	127	128	131	130	128	112	109	141	125	117	110	145	113
Tr_375	112	107	130	123	105	133	113	110	124	111	109	116	132	120	125	105	105	119	123	113	119	90	118	118	114	124	98	124	114	125	109	111	114	119	130	116	118	121	128	117	121	115	106	116	122	118	115	130	122
Tr_376	117	106	119	124	104	128	104	123	123	100	122	105	109	121	128	106	104	122	122	120	116	115	119	131	135	117	115	117	119	134	134	108	119	118	127	131	135	124	117	122	124	120	121	115	125	125	104	129	127
Tr_377	116	103	130	123	103	131	117	118	118	115	109	124	120	124	121	107	117	113	117	107	131	100	102	122	114	116	108	108	106	121	121	127	108	105	116	112	122	123	122	115	119	99	116	124	118	114	109	142	120
Tr_378	126	117	136	133	131	125	119	120	122	125	121	126	130	120	143	125	123	131	127	125	129	132	110	124	116	130	122	136	118	141	135	121	128	137	124	122	140	135	124	125	133	127	116	128	136	132	131	132	138
Tr_379	107	108	129	118	102	128	104	115	133	122	120	117	115	123	126	110	128	122	106	124	116	105	113	129	125	115	117	109	119	134	122	120	115	108	139	125	135	118	119	110	110	122	115	125	125	121	110	131	117
Tr_380	105	104	131	124	110	126	112	117	105	124	122	127	115	117	128	108	108	116	122	118	110	129	125	113	113	125	115	113	113	140	126	116	111	102	125	117	129	116	119	110	98	118	111	115	115	107	104	119	109
Tr_381	96	113	138	147	117	131	119	114	114	117	129	136	112	120	131	125	121	127	119	123	133	118	126	132	124	130	128	132	106	147	131	127	118	111	138	128	134	121	120	113	119	121	110	120	144	128	113	132	138
Tr_382	120	125	122	127	113	139	131	104	136	127	121	128	124	120	121	107	109	117	137	129	119	128	116	118	122	114	124	116	118	135	135	125	116	117	120	132	130	131	120	119	117	121	118	130	124	130	117	128	124
Tr_383	114	115	118	127	111	125	111	116	128	119	109	124	110	112	115	105	107	113	111	117	129	110	118	120	120	112	112	114	114	141	119	119	114	97	136	128	122	123	102	115	109	105	116	108	122	114	101	126	108
Tr_384	141	120	133	142	130	126	136	125	121	134	122	133	137	121	124	110	112	122	140	120	138	127	119	129	131	141	125	129	121	138	142	134	117	130	137	127	145	134	129	132	116	132	109	117	129	129	110	139	129
Tr_385	138	125	130	143	131	131	135	130	120	129	109	128	130	130	145	117	127	125	117	123	123	126	124	140	132	138	128	136	122	143	141	141	138	135	148	118	136	127	128	119	141	123	110	126	136	150	131	122	144
Tr_386	107	104	123	112	108	122	112	121	115	112	106	125	111	119	128	104	108	114	108	104	120	117	113	123	127	113	113	129	107	124	124	126	105	112	117	115	121	110	125	118	116	114	105	105	133	119	108	119	127
Tr_387	121	116	119	130	106	140	116	117	121	110	118	115	127	123	124	116	108	126	112	104	126	97	113	129	113	131	113	113	117	124	114	130	115	112	121	133	115	116	125	122	122	118	109	125	141	115	110	127	125
Tr_388	93	104	133	122	108	132	118	123	117	110	110	135	115	117	116	116	100	110	126	116	120	115	119	129	117	117	125	111	107	142	130	118	113	104	135	133	123	120	125	112	112	110	101	119	129	115	104	119	127
Tr_389	108	97	134	125	117	129	111	122	110	117	111	118	120	118	113	115	115	119	129	129	111	112	104	116	114	124	114	112	116	143	125	109	118	103	128	144	120	129	122	117	107	109	108	124	124	118	109	130	118
Tr_390	102	107	118	113	97	123	107	104	108	103	105	112	114	122	107	103	103	109	129	113	115	96	112	110	104	116	112	118	110	131	125	125	104	107	116	120	116	121	110	103	95	103	100	94	116	104	99	124	118
Tr_391	120	105	126	125	117	137	121	110	118	113	115	116	130	112	125	99	109	121	119	125	119	118	126	122	120	132	118	120	100	117	115	125	112	123	128	132	120	111	118	119	127	113	112	114	124	124	107	130	122
Tr_392	119	120	131	132	122	132	118	131	125	128	128	123	129	127	142	128	118	120	124	124	136	117	131	123	117	119	117	129	119	146	132	124	121	112	127	137	125	142	129	126	126	118	121	125	135	121	112	147	127
Tr_393	119	102	117	120	106	120	120	117	109	116	110	109	129	119	122	104	108	128	120	106	118	103	109	125	113	117	113	101	113	132	112	110	101	106	119	111	109	114	117	110	106	100	105	127	127	115	108	119	119
Tr_394	114	103	124	125	111	127	129	106	116	111	121	100	128	116	117	115	113	115	119	109	119	100	118	114	112	126	122	118	120	125	113	127	104	117	122	140	122	121	128	129	121	113	114	114	132	114	111	138	118
Tr_395	118	113	136	125	109	123	125	118	118	117	113	124	118	124	123	117	117	123	131	113	119	122	130	118	128	116	128	132	118	149	133	135	116	119	118	130	124	137	124	137	133	107	108	114	132	120	101	132	108
Tr_396	111	106	115	124	116	128	126	121	117	126	118	123	129	127	128	116	118	108	120	116	128	123	123	133	137	123	115	119	107	132	130	124	119	114	127	131	131	116	121	118	124	110	125	119	123	127	104	113	127
Tr_397	102	105	120	123	109	119	115	108	114	103	113	114	114	116	109	105	115	109	121	105	109	108	114	128	116	112	96	116	102	131	129	125	110	119	122	128	126	119	108	109	109	107	116	108	110	106	103	122	114
Tr_398	126	113	122	137	119	135	119	124	128	131	139	126	140	140	135	129	137	129	121	143	129	114	110	130	136	132	124	120	114	139	131	109	124	121	136	140	134	131	128	129	123	113	116	134	134	118	115	136	122
Tr_399	105	98	119	124	114	124	126	115	121	126	126	123	119	137	118	136	126	132	132	128	138	121	125	141	121	137	121	129	131	132	130	140	107	126	137	139	129	126	107	132	126	124	139	131	129	121	114	141	125
Tr_400	107	102	123	122	100	120	118	95	113	112	122	123	107	131	108	104	114	112	126	108	110	115	121	123	107	113	111	109	103	128	114	112	117	110	129	119	113	114	111	112	112	100	99	119	107	125	102	127	113
Tr_401	118	115	134	135	115	127	107	110	128	121	119	128	112	112	123	121	109	121	125	107	121	110	118	132	118	138	122	106	116	131	131	125	116	129	134	140	108	131	104	119	119	109	132	120	130	120	111	148	126
Tr_402	125	116	135	138	110	140	126	133	123	128	112	119	131	129	134	118	136	126	124	120	142	119	119	131	121	125	115	137	113	142	116	118	131	124	137	145	129	142	123	144	142	110	125	131	143	139	116	139	135
Tr_403	123	108	135	126	116	114	120	123	123	116	112	121	107	129	124	114	110	126	110	112	118	127	105	137	115	121	127	117	115	132	130	126	115	124	117	123	131	130	127	112	122	118	119	127	127	125	118	135	137
Tr_404	123	118	127	134	116	140	124	109	117	122	120	115	123	115	116	110	126	124	126	110	132	105	123	123	113	115	113	125	113	136	120	126	127	110	119	125	127	126	125	112	130	102	109	123	113	125	106	123	115
Tr_405	119	104	121	122	88	156	102	109	125	106	124	131	127	133	116	116	106	112	136	126	120	107	121	127	111	121	111	99	113	136	122	122	117	110	137	133	111	140	129	132	122	108	101	121	119	119	98	145	119
Tr_406	120	117	132	135	123	107	127	126	116	123	117	118	108	124	111	107	127	117	117	113	127	126	118	122	126	122	128	138	116	129	125	119	124	111	128	116	114	109	92	125	113	115	126	132	126	122	115	126	124
Tr_407	109	104	113	120	114	124	116	103	119	118	124	121	121	129	106	108	110	128	130	120	116	121	121	123	121	123	123	113	115	138	118	118	95	120	123	125	121	116	107	124	112	116	121	113	121	111	106	125	123
Tr_408	116	107	130	123	105	137	117	106	122	107	125	122	128	116	117	101	117	117	129	115	119	112	120	132	126	130	112	118	114	133	127	127	118	125	130	122	126	121	114	117	113	119	112	112	118	108	101	128	120
Tr_409	95	104	115	118	94	126	100	117	121	120	118	119	103	123	106	116	110	130	122	116	110	103	119	125	109	123	121	117	109	134	124	124	111	124	133	125	115	126	107	114	112	104	123	109	111	121	96	135	133
Tr_410	115	108	133	136	118	126	122	125	115	124	124	129	117	139	128	112	128	120	130	132	128	123	125	139	141	111	129	131	131	130	116	132	131	122	139	131	143	120	113	120	128	126	127	127	115	121	122	131	131
Tr_411	112	123	124	125	113	139	121	112	122	121	111	134	134	110	117	113	97	111	117	115	111	116	126	138	116	110	120	112	122	123	99	129	110	125	144	130	142	127	130	123	123	113	112	104	126	120	111	120	116
Tr_412	130	127	136	133	119	133	127	126	122	125	121	128	136	126	123	117	117	117	129	115	131	116	114	146	140	124	124	132	132	127	105	127	122	133	132	126	140	115	134	117	141	119	114	128	124	120	121	124	120
Tr_413	118	95	118	123	99	123	103	108	116	105	117	110	118	118	103	101	113	109	129	111	111	100	104	118	132	118	108	114	126	129	117	117	112	115	122	134	120	113	120	119	107	109	108	104	106	114	105	124	120
Tr_414	116	123	134	133	117	127	121	134	122	125	131	114	126	130	139	119	119	125	113	129	129	130	134	116	120	110	124	136	124	129	125	117	130	123	132	122	128	121	126	131	135	113	126	120	130	124	121	138	126
Tr_415	120	113	144	125	113	111	121	116	124	115	113	124	130	128	113	109	111	121	125	123	127	118	112	136	130	134	132	138	134	127	127	119	112	127	130	120	122	113	120	119	135	125	116	118	114	118	127	124	122
Tr_416	129	130	123	138	120	132	120	131	141	124	134	135	125	129	132	124	108	130	128	126	130	127	135	139	125	135	119	135	129	150	136	140	129	130	139	119	131	126	125	120	128	116	129	123	125	125	122	133	135
Tr_417	116	109	110	123	117	129	115	114	124	107	117	122	132	130	121	121	97	115	133	121	121	118	130	124	126	122	120	118	126	133	129	117	106	125	130	140	114	113	114	103	101	107	114	116	118	116	115	120	120
Tr_418	115	106	135	132	112	118	122	125	113	122	104	125	125	123	132	96	100	116	122	114	134	121	117	111	119	121	125	133	117	130	120	122	115	112	117	129	121	114	119	108	110	112	107	119	119	119	116	131	123
Tr_419	113	108	117	126	116	118	98	113	111	122	102	113	131	113	126	104	110	126	122	122	128	107	127	121	107	123	123	131	107	126	104	128	105	118	121	135	103	116	119	114	122	104	119	125	133	125	108	129	123
Tr_420	116	125	112	129	129	113	125	124	116	131	127	118	124	136	131	121	113	131	133	123	133	136	134	128	126	140	136	132	134	151	139	141	134	131	124	140	134	117	118	131	131	131	128	140	130	124	123	126	124
Tr_421	104	121	116	133	113	123	113	126	126	127	111	128	126	140	121	121	121	121	127	131	123	122	128	124	130	130	124	132	118	141	127	133	116	133	134	138	124	131	118	125	111	127	130	118	124	124	109	128	126
Tr_422	112	113	122	117	109	125	107	116	110	113	111	122	128	116	125	103	101	111	109	115	109	118	124	136	116	124	106	120	124	127	107	131	118	119	138	116	134	117	128	109	107	103	124	98	114	106	103	108	114
Tr_423	108	113	120	125	115	107	109	114	116	111	111	124	116	114	101	109	113	103	117	107	115	118	118	124	128	128	116	116	120	135	115	119	116	109	124	138	118	109	114	113	111	113	116	110	114	112	101	118	114
Tr_424	95	108	117	118	112	122	120	107	109	122	112	115	111	129	128	104	116	104	114	106	96	99	121	105	115	107	121	119	117	136	106	122	123	108	129	125	119	102	109	104	114	102	115	119	117	109	88	117	103
Tr_425	110	113	128	137	113	127	121	118	114	113	125	120	124	132	129	107	119	123	123	123	109	124	118	122	120	116	120	124	110	139	115	115	126	105	144	130	128	117	102	109	115	115	108	116	116	112	109	142	112
Tr_426	109	112	117	128	110	128	112	111	117	104	104	127	117	127	124	112	106	108	132	122	116	101	123	125	121	113	129	113	125	128	112	126	109	106	131	141	129	106	103	116	120	112	115	111	113	119	104	131	121
Tr_427	106	117	126	125	121	121	105	114	110	123	121	130	106	120	109	113	119	115	123	111	133	118	126	130	112	110	114	120	114	139	121	123	114	103	130	124	112	113	88	107	107	107	128	110	112	122	109	126	130
Tr_428	121	114	127	122	100	128	118	115	117	112	126	129	121	115	106	106	120	114	128	118	122	111	133	123	127	125	123	127	125	136	126	122	117	116	125	125	125	118	127	122	118	110	117	115	119	125	116	145	145
Tr_429	117	132	137	140	124	124	120	139	111	118	110	117	117	125	138	116	128	126	126	116	132	127	117	129	123	125	117	133	133	136	138	128	139	132	129	131	135	128	125	118	114	128	121	127	123	107	122	107	119
Tr_430	118	109	128	125	119	135	125	118	128	111	121	124	130	132	123	115	111	121	131	127	123	114	128	110	112	128	138	130	136	131	129	129	106	115	128	130	122	123	130	123	115	119	116	124	134	130	119	152	142
Tr_431	127	112	137	130	120	132	126	109	127	112	130	133	129	145	128	118	118	120	136	132	120	121	135	137	129	139	123	117	133	128	130	122	123	108	139	127	129	134	119	120	130	118	113	129	129	141	118	153	139
Tr_432	114	105	124	119	117	141	119	110	126	115	121	120	116	122	119	111	109	123	125	127	115	114	124	124	114	124	120	114	130	131	137	137	108	107	134	120	122	129	114	115	99	119	112	120	112	112	109	130	130
Tr_433	108	109	124	129	103	133	103	106	122	101	121	120	114	126	115	103	109	123	133	117	117	116	132	134	116	124	100	112	122	137	123	127	120	109	120	128	122	121	114	111	115	117	104	110	110	124	103	138	130
Tr_434	116	111	130	123	105	127	123	112	116	115	127	114	122	132	99	115	131	109	127	115	121	108	122	124	128	114	100	114	138	143	119	117	132	97	132	132	124	119	118	117	113	119	108	116	112	118	107	140	118
Tr_435	120	121	118	125	113	127	107	126	120	121	111	118	122	120	123	117	113	121	123	117	121	112	116	134	122	114	116	108	120	137	107	115	124	107	122	132	114	121	120	121	127	117	102	130	124	112	107	128	110
Tr_436	105	112	127	128	118	120	110	123	121	130	116	125	99	131	118	114	112	114	122	122	118	115	121	109	123	123	115	131	115	142	114	120	119	122	131	137	127	118	117	112	114	124	111	125	115	117	114	125	129
Tr_437	119	108	127	138	114	132	106	129	131	114	126	125	117	133	114	118	112	126	134	128	120	117	125	131	129	125	131	127	115	146	130	136	129	108	125	143	133	116	117	130	122	126	111	119	139	125	118	143	129
Tr_438	128	115	136	139	127	127	113	122	114	125	123	106	118	132	117	113	117	121	123	129	133	114	124	142	130	128	128	144	134	133	125	137	128	123	128	142	128	113	106	121	131	119	128	114	110	108	117	128	106
Tr_439	111	108	125	120	108	132	114	113	121	114	124	115	121	123	102	106	114	126	128	116	106	113	121	121	119	125	109	119	121	134	118	116	123	108	123	123	129	112	111	124	128	118	107	101	95	121	112	129	113
Tr_440	113	104	117	126	108	116	100	113	119	116	110	113	105	117	122	114	108	124	114	122	114	109	115	137	117	123	115	119	119	144	118	114	121	110	129	127	135	118	103	118	114	112	115	109	119	115	114	119	115
Tr_441	125	124	137	134	130	126	120	111	129	120	136	133	123	137	120	118	130	134	138	126	122	123	133	145	121	125	127	137	119	148	126	142	141	128	147	141	139	120	113	128	124	132	125	117	131	131	114	135	123
Tr_442	119	120	127	136	134	132	116	117	135	112	120	129	125	139	134	132	116	130	116	134	132	127	131	135	115	135	137	121	131	150	134	122	117	126	151	143	135	124	119	134	128	134	129	125	131	121	116	149	123
Tr_443	105	100	113	114	102	130	92	105	125	106	118	113	117	125	110	104	108	126	128	126	108	101	119	129	105	121	109	105	101	126	112	118	99	114	127	117	111	112	107	116	110	104	103	113	105	111	104	129	115
Tr_444	106	103	114	113	77	129	93	94	110	99	109	114	118	134	115	111	95	103	129	111	115	96	112	114	100	108	104	96	106	137	119	117	100	99	124	132	110	127	114	109	109	109	94	106	104	88	79	132	108
Tr_445	117	114	121	120	104	116	98	109	123	106	112	105	125	119	116	104	114	120	128	118	124	101	123	113	113	109	109	123	119	130	114	124	117	102	127	117	117	118	107	118	112	100	115	111	111	101	104	135	111
Tr_446	120	133	140	133	115	135	121	120	142	133	127	134	132	118	127	115	121	119	135	115	121	120	140	120	126	130	128	134	126	145	135	139	130	131	130	134	140	131	126	117	127	145	122	112	126	128	119	132	124
Tr_447	122	125	134	139	133	131	117	130	124	137	135	132	128	138	139	125	127	141	131	131	137	124	138	128	130	128	128	144	128	133	133	143	128	139	142	146	148	139	134	135	131	123	136	140	124	122	119	138	130
Tr_448	120	115	118	135	111	119	115	116	130	119	119	120	128	118	117	103	101	119	139	107	129	116	114	128	116	116	114	120	126	131	117	111	102	107	108	120	118	127	134	123	123	113	114	112	122	112	113	124	118
[truncated: 399 more columns]
